# Supplementary material for: Pre-arrest and intra-arrest prognostic factors associated with survival after in-hospital cardiac arrest: systematic review and meta-analysis
Source: PubMed Central journal article supplement — BMJ. 2019 Dec 4;367:l6373. doi: 10.1136/bmj.l6373 (PMC6891802; doi:10.1136/bmj.l6373), 2019-12-04
Supplement: fers051261.ww.pdf [file fers051261.ww.pdf]

Fernando SM, Tran A, Cheng W, Rochweg B, Taljaard M, Vaillancourt C, Rowan KM, Harrison DA, Nolan JP, Kyeremanteng K, McIsaac DI, Guyatt GH, Perry JJ. Pre- and Intra-Arrest Factors Associated with Survival Following Adult In-Hospital Cardiac Arrest – A Systematic Review and Meta-Analysis

## **ELECTRONIC APPENDIX**

|                                                                                                                                                                                  |    |
|----------------------------------------------------------------------------------------------------------------------------------------------------------------------------------|----|
| Supplemental Table 1: Standardized Data Extraction Sheet .....                                                                                                                   | 4  |
| Supplemental Table 2: CHARMS-PF Checklist Detailed Characteristics of the 23 Included Cohorts .....                                                                              | 6  |
| Supplemental Table 3 – CHARMS-PF Checklist of Key Items in 23 Included Studies ..                                                                                                |    |
| Supplemental Table 4: Pre-Arrest Factors Evaluated in the 23 Included Cohorts .....                                                                                              | 11 |
| Supplemental Table 5: Intra-Arrest Factors Evaluated in the 23 Included Cohorts .....                                                                                            | 12 |
| Supplemental Table 6: Prognostic Factors Included in Adjustment for Mortality in the 23 Included Cohorts .....                                                                   | 13 |
| Supplemental Table 7: QUIPS Quality Assessment for Risk of Bias of the 23 Included Cohorts .....                                                                                 | 14 |
| Supplemental Table 8: GRADE Certainty of Prognostic Estimates – Pre-Arrest Factors                                                                                               | 15 |
| Supplemental Table 9: GRADE Certainty of Prognostic Estimates – Intra-Arrest Factors .....                                                                                       | 17 |
| Supplemental Table 10: CHARMS-PF Checklist Detailed Characteristics of the 30 Studies with Unadjusted Values Only .....                                                          | 19 |
| Supplemental Table 11: Results of Meta-Analysis of Unadjusted Analyses for Prediction of Survival Following In-Hospital Cardiac Arrest.....                                      | 25 |
| Supplemental Figure 2: Forest Plots of Adjusted and Unadjusted Analyses for Association Between Male Sex and Survival Following In-Hospital Cardiac Arrest. ....                 | 26 |
| Supplemental Figure 3: Forest Plots of Adjusted and Unadjusted Analyses for Association Between Age and Survival Following In-Hospital Cardiac Arrest.....                       | 27 |
| Supplemental Figure 4: Forest Plots of Adjusted and Unadjusted Analyses for Association Between Malignancy and Survival Following In-Hospital Cardiac Arrest. .                  | 28 |
| Supplemental Figure 5: Forest Plots of Adjusted and Unadjusted Analyses for Association Between Congestive Heart Failure and Survival Following In-Hospital Cardiac Arrest. .... | 29 |
| Supplemental Figure 6: Forest Plots of Adjusted and Unadjusted Analyses for Association Between Chronic Kidney Disease and Survival Following In-Hospital Cardiac Arrest. ....   | 30 |

|                                                                                                                                                                                              |    |
|----------------------------------------------------------------------------------------------------------------------------------------------------------------------------------------------|----|
| Supplemental Figure 7: Forest Plots of Adjusted and Unadjusted Analyses for Association Between Chronic Obstructive Pulmonary Disease and Survival Following In-Hospital Cardiac Arrest..... | 31 |
| Supplemental Figure 8: Forest Plots of Adjusted and Unadjusted Analyses for Association Between Diabetes Mellitus and Survival Following In-Hospital Cardiac Arrest.....                     | 32 |
| Supplemental Figure 9: Forest Plots of Adjusted and Unadjusted Analyses for Association Between Acute Coronary Syndrome and Survival Following In-Hospital Cardiac Arrest. ....              | 33 |
| Supplemental Figure 10: Forest Plots of Adjusted and Unadjusted Analyses for Association Between Sepsis and Survival Following In-Hospital Cardiac Arrest. ....                              | 34 |
| Supplemental Figure 11: Forest Plots of Adjusted and Unadjusted Analyses for Association Between Witnessed Arrest and Survival Following In-Hospital Cardiac Arrest.....                     | 35 |
| Supplemental Figure 12: Forest Plots of Adjusted and Unadjusted Analyses for Association Between Monitored Arrest and Survival Following In-Hospital Cardiac Arrest.....                     | 36 |
| Supplemental Figure 13: Forest Plots of Adjusted and Unadjusted Analyses for Association Between Arrest During Daytime Hours and Survival Following In-Hospital Cardiac Arrest. ....         | 37 |
| Supplemental Figure 14: Forest Plots of Adjusted and Unadjusted Analyses for Association Between Ventricular Tachycardia and Survival Following In-Hospital Cardiac Arrest. ....             | 38 |
| Supplemental Figure 15: Forest Plots of Adjusted and Unadjusted Analyses for Association Between Ventricular Fibrillation and Survival Following In-Hospital Cardiac Arrest.....             | 39 |
| Supplemental Figure 16: Forest Plots of Adjusted and Unadjusted Analyses for Association Between Asystole and Survival Following In-Hospital Cardiac Arrest. ....                            | 40 |
| Supplemental Figure 17: Forest Plots of Adjusted and Unadjusted Analyses for Association Between Pulseless Electric Activity and Survival Following In-Hospital Cardiac Arrest. ....         | 41 |
| Supplemental Figure 18: Forest Plots of Adjusted and Unadjusted Analyses for Association Between Shockable Rhythm and Survival Following In-Hospital Cardiac Arrest.....                     | 42 |
| Supplemental Figure 19: Forest Plots of Adjusted and Unadjusted Analyses for Association Between Endotracheal Intubation and Survival Following In-Hospital Cardiac Arrest. ....             | 43 |
| Supplemental Figure 20: Forest Plots of Adjusted and Unadjusted Analyses for Association Between Resuscitation Duration > 15 minutes and Survival Following In-Hospital Cardiac Arrest.....  | 44 |

**Supplemental Figure 1: Electronic Search Strategies.****Databases Searched:**

- EMBASE Classic + Embase
- PubMed/Medline
- Scopus
- Web of Science
- Cochrane Central Register of Controlled Trials (CENTRAL)

**EMBASE Classic + EMBASE 1947 to Week 6 2019**

Date of Search: February 4, 2019

|           | <b>Search Strategy</b>                      | <b>Results</b> |
|-----------|---------------------------------------------|----------------|
| <b>1</b>  | cardiac arrest.mp.                          | 48710          |
| <b>2</b>  | cardiac arrest.tw.                          | 45943          |
| <b>3</b>  | predict*.ti.                                | 406857         |
| <b>4</b>  | model*.ti.                                  | 641230         |
| <b>5</b>  | utility.ti.                                 | 41033          |
| <b>6</b>  | scor*.ti.                                   | 80730          |
| <b>7</b>  | validat*.ti.                                | 94766          |
| <b>8</b>  | risk*.ti.                                   | 601828         |
| <b>9</b>  | prognos*.ti.                                | 187311         |
| <b>10</b> | associat*.ti.                               | 906282         |
| <b>11</b> | factor*.ti.                                 | 782852         |
| <b>12</b> | 3 or 4 or 5 or 6 or 7 or 8 or 9 or 10 or 11 | 3252259        |
| <b>13</b> | 1 or 2                                      | 48710          |
| <b>14</b> | <b>12 and 13</b>                            | <b>8740</b>    |

**PubMed/MEDLINE 1946 to Week 6 2019**

Date of Search: February 4, 2019

|           | <b>Search Strategy</b>                      | <b>Results</b> |
|-----------|---------------------------------------------|----------------|
| <b>1</b>  | cardiac arrest.mp.                          | 31296          |
| <b>2</b>  | cardiac arrest.tw.                          | 29876          |
| <b>3</b>  | predict*.ti.                                | 285873         |
| <b>4</b>  | model*.ti.                                  | 531484         |
| <b>5</b>  | utility.ti.                                 | 28233          |
| <b>6</b>  | scor*.ti.                                   | 54190          |
| <b>7</b>  | validat*.ti.                                | 66976          |
| <b>8</b>  | risk*.ti.                                   | 439025         |
| <b>9</b>  | prognos*.ti.                                | 139705         |
| <b>10</b> | associat*.ti.                               | 746962         |
| <b>11</b> | factor*.ti.                                 | 667491         |
| <b>12</b> | 3 or 4 or 5 or 6 or 7 or 8 or 9 or 10 or 11 | 2606543        |
| <b>13</b> | 1 or 2                                      | 31296          |
| <b>14</b> | <b>12 and 13</b>                            | <b>4925</b>    |

**Supplemental Table 1: Standardized Data Extraction Sheet**

| <b>Data to be Extracted</b>                                                                                                                                                                | <b>Notes to Reviewer</b>                                                                  |
|--------------------------------------------------------------------------------------------------------------------------------------------------------------------------------------------|-------------------------------------------------------------------------------------------|
| <b>Basic Study Information</b>                                                                                                                                                             |                                                                                           |
| Study Title                                                                                                                                                                                |                                                                                           |
| Journal/Conference                                                                                                                                                                         |                                                                                           |
| Conference Abstract vs. Full-text                                                                                                                                                          |                                                                                           |
| Year of Publication                                                                                                                                                                        |                                                                                           |
| Language                                                                                                                                                                                   | If published in language other than English - Exclude                                     |
| Author                                                                                                                                                                                     | List first author only                                                                    |
| Correspondence Email                                                                                                                                                                       |                                                                                           |
| Study Design                                                                                                                                                                               |                                                                                           |
| Prospective vs. Retrospective                                                                                                                                                              |                                                                                           |
| Number of Sites                                                                                                                                                                            |                                                                                           |
| Country/Countries of Study                                                                                                                                                                 |                                                                                           |
| <b>Eligibility Assessment</b>                                                                                                                                                              |                                                                                           |
| Does the study include only adult patients (i.e. $\geq 16$ years of age)?                                                                                                                  | If “No” – Exclude                                                                         |
| Does the study only include patients with in-hospital cardiac arrest (IHCA)?                                                                                                               | If “No” – Exclude                                                                         |
| Does the study include patients from <u>any</u> of the following: A) Emergency Department; B) Intensive Care Unit; C) Hospital Wards                                                       | If “No” – Exclude                                                                         |
| Does the study provide original data related to pre-arrest and intra-arrest variables of interest?                                                                                         | If “No” – Exclude                                                                         |
| Does the study provide short-term mortality outcome data (i.e. in-hospital, or 30-day)?                                                                                                    | If “No” – Exclude                                                                         |
| Does the study include cases of out-of-hospital cardiac arrest?                                                                                                                            | If “Yes” – Exclude                                                                        |
| Does the study only include patients receiving a particular post-arrest investigation (e.g. computed tomography) or treatment (e.g. therapeutic hypothermia, extracorporeal life support)? | If “Yes” – Exclude                                                                        |
| Is the data presented in the study completely included in another report?                                                                                                                  | If “Yes” – Exclude, include only study with the largest number of patients                |
| Are the unadjusted or adjusted odds ratios stated, or can they be derived?                                                                                                                 | If “No” – Contact Corresponding Author, if no response after three attempts, then exclude |
| <b>Prognostic Factors</b>                                                                                                                                                                  |                                                                                           |
| In what setting were prognostic factors calculated?                                                                                                                                        | e.g. Emergency Department, ICU                                                            |

Survival Following In-Hospital Cardiac Arrest - Systematic Review – Supplement

| <b>Outcome</b>                                                         |                                                             |
|------------------------------------------------------------------------|-------------------------------------------------------------|
| How was mortality defined (i.e. timing of outcome)?                    | i.e. in-hospital or 30-day                                  |
| <b>Study Population</b>                                                |                                                             |
| From which setting were patients recruited?                            | e.g. Emergency Department, Hospital Wards, ICU              |
| Was population was included?                                           |                                                             |
| Were elderly patients included?                                        |                                                             |
| Were patients with a 'Do Not Resuscitate' (or similar) order included? |                                                             |
| Were pregnant patients included?                                       |                                                             |
| Were patients with any other co-morbidity included/excluded?           |                                                             |
| <b>Odds Ratio Index Factor 1</b>                                       |                                                             |
| Pre-/Intra-arrest factor evaluated                                     | e.g. age, sex, witnessed, shockable                         |
| Total number of patients                                               |                                                             |
| Total number of Mortality+ Patients                                    |                                                             |
| Total number of Mortality- patients                                    |                                                             |
| Total number of Factor+ patients                                       |                                                             |
| Total number of Factor- patients                                       |                                                             |
| Unadjusted Odds Ratio                                                  |                                                             |
| Adjusted Odds Ratio                                                    |                                                             |
| Confounders included in model adjustment                               |                                                             |
| <b>Odds Ratio Index Factor 2</b>                                       |                                                             |
| Pre-/Intra-arrest factor evaluated                                     | e.g. age, sex, witnessed, shockable                         |
| Total number of patients                                               |                                                             |
| Total number of Mortality+ Patients                                    |                                                             |
| Total number of Mortality- patients                                    |                                                             |
| Total number of Factor+ patients                                       |                                                             |
| Total number of Factor- patients                                       |                                                             |
| Unadjusted Odds Ratio                                                  |                                                             |
| Adjusted Odds Ratio                                                    |                                                             |
| Confounders included in model adjustment                               |                                                             |
| <b>Author Contact</b>                                                  |                                                             |
| Contact author?                                                        | If more information needed, indicate here to contact author |

**Supplemental Table 2: CHARMS-PF Checklist Detailed Characteristics of the 23 Included Cohorts** (Adapted from Riley *et al.*, *BMJ*, 2019).

Abbreviations: CPR = Cardiopulmonary Resuscitation; ED = Emergency Department; ICU = Intensive Care Unit; IHCA = In-Hospital Cardiac Arrest  
OHCA = Out-of-Hospital Cardiac Arrest; OR = Operating Room

| Author (Year)   | Journal                | Type of Study              | Sites | Country | Years     | Sample Size | Survived to Hospital Discharge | % Survival | Inclusion Criteria                                                                            | Exclusion Criteria                                                                  |
|-----------------|------------------------|----------------------------|-------|---------|-----------|-------------|--------------------------------|------------|-----------------------------------------------------------------------------------------------|-------------------------------------------------------------------------------------|
| Al-Dury (2017)  | <i>Am J Emerg Med</i>  | Retrospective Cohort Study | 66    | Sweden  | 2006-2015 | 14933       | 4181                           | 28.0       | Patients 18 years or older, suffering IHCA, receiving CPR                                     |                                                                                     |
| Ballew (1994)   | <i>Arch Intern Med</i> | Retrospective Cohort Study | 1     | USA     | 1990-1991 | 313         | 50                             | 16.0       | > or = 18, ICD diagnosis of cardiac arrest OR completion of cardiac arrest form, received CPR | <18, OHCA, arrest in non-ward location (ED, OR, recovery room, or cardiac cath lab) |
| Bialecki (1995) | <i>Chest</i>           | Retrospective Cohort Study | 1     | USA     | 1989-1991 | 242         | 40                             | 16.5       | Adult patients with attempt at CPR following cardiac arrest in-hospital                       |                                                                                     |
| Brady (2011)    | <i>Resuscitation</i>   | Prospective Cohort Study   |       | USA     | 2000-2008 | 74213       | 13224                          | 17.8       | Adult patients experiencing cardiac arrest in-hospital                                        |                                                                                     |
| Brindley (2002) | <i>CMAJ</i>            | Retrospective Cohort Study | 3     | Canada  | 1997-1999 | 247         | 28                             | 11.3       | > or = 18, received CPR                                                                       | Admitted to ICU, non-ward location (ED, OR), incomplete record                      |

## Survival Following In-Hospital Cardiac Arrest - Systematic Review – Supplement

|                  |                         |                            |   |             |           |     |     |      |                                                                         |                                                  |
|------------------|-------------------------|----------------------------|---|-------------|-----------|-----|-----|------|-------------------------------------------------------------------------|--------------------------------------------------|
| Chan (2013)      | <i>Am J Emerg Med</i>   | Retrospective Cohort Study | 2 | Hong Kong   | 2008      | 431 | 23  | 5.3  | Adult patients with in-hospital resuscitation following cardiac arrest  |                                                  |
| Chen (2016)      | <i>J Chin Med Assoc</i> | Retrospective Cohort Study | 1 | Taiwan      | 2012      | 382 | 45  | 11.8 | Adult patients with in-hospital resuscitation following cardiac arrest  | OHCA, 'Do Not Resuscitate' order                 |
| Cleverley (2013) | <i>Resuscitation</i>    | Retrospective Cohort Study | 6 | Canada      | 2002-2006 | 668 | 66  | 9.9  | > or = 18. receiving CPR                                                | Catheterization laboratory, CCU, ICU, OR arrests |
| Danciu (2004)    | <i>Resuscitation</i>    | Retrospective Cohort Study | 1 | USA         | 2000-2002 | 219 | 33  | 15.1 | Adult patients with attempt at CPR following cardiac arrest in-hospital |                                                  |
| de Vos (1999)    | <i>Arch Intern Med</i>  | Retrospective Cohort Study | 1 | Netherlands | 1988-1994 | 553 | 120 | 21.7 | Adult patients with attempt at CPR following cardiac arrest in-hospital | OHCA, 2nd IHCA during same hospitalization       |
| Doig (2000)      | <i>Clin Invest Med</i>  | Prospective Cohort Study   | 1 | Canada      | 1992-1994 | 239 | 51  | 21.3 | Adult patients with attempt at CPR following cardiac arrest in-hospital |                                                  |
| Dumot (2001)     | <i>Arch Intern Med</i>  | Retrospective Cohort Study | 1 | USA         | 1994-1995 | 445 | 104 | 23.4 | ≥18 years, receiving CPR for IHCA                                       | <18 years, 'Do Not Resuscitate' order            |

## Survival Following In-Hospital Cardiac Arrest - Systematic Review – Supplement

|                |                       |                            |     |           |           |       |       |      |                                                                            |                                                           |
|----------------|-----------------------|----------------------------|-----|-----------|-----------|-------|-------|------|----------------------------------------------------------------------------|-----------------------------------------------------------|
| Hessulf (2018) | <i>Int J Cardiol</i>  | Retrospective Cohort Study | 66  | Sweden    | 2006-2015 | 17747 | 5058  | 28.5 | Patients 18 years or older, suffering IHCA, receiving CPR                  |                                                           |
| Larkin (2010)  | <i>Resuscitation</i>  | Prospective Cohort Study   | 366 | USA       | 2000-2004 | 49130 | 7812  | 15.9 | Adult patients experiencing cardiac arrest in-hospital                     |                                                           |
| Li (2018)      | <i>Am J Emerg Med</i> | Retrospective Cohort Study | 3   | China     | 2012-2016 | 320   | 68    | 21.3 | Adult patients with acute coronary syndrome, complicated by cardiac arrest | OHCA, 'Do Not Resuscitate' order                          |
| Marwick (1991) | <i>Resuscitation</i>  | Prospective Cohort Study   | 1   | Australia | 1984-1987 | 710   | 193   | 27.2 | Patients attended to by Cardiac Arrest Team                                | Respiratory arrests                                       |
| Meaney (2010)  | <i>Crit Care Med</i>  | Prospective Cohort Study   | 411 | USA       | 1999-2005 | 51919 | 9125  | 17.6 | Adult patients experiencing cardiac arrest in-hospital                     |                                                           |
| Ohlsson (2014) | <i>Resuscitation</i>  | Prospective Cohort Study   | 1   | Sweden    | 2007-2010 | 287   | 58    | 20.2 | Prospectively enrolled following cardiac arrest                            | Pediatric cases, 'Do Not Resuscitate' order, missing data |
| Peberdy (2008) | <i>JAMA</i>           | Prospective Cohort Study   | 507 | USA       | 2000-2007 | 86748 | 15743 | 18.1 | Adult patients experiencing cardiac arrest in-hospital                     |                                                           |
| Shao (2016)    | <i>Resuscitation</i>  | Prospective Cohort Study   | 12  | China     | 2014      | 2712  | 247   | 9.1  | ≥ 14 years, pulseless, receiving CPR                                       |                                                           |



## Survival Following In-Hospital Cardiac Arrest - Systematic Review – Supplement

|                  |                        |                            |     |                |           |       |       |      |                                             |
|------------------|------------------------|----------------------------|-----|----------------|-----------|-------|-------|------|---------------------------------------------|
| Skrifvars (2007) | <i>Resuscitation</i>   | Prospective Cohort Study   | 5   | Finland        | 1994-2003 | 1578  | 463   | 29.3 | Patients attended to by Cardiac Arrest Team |
| Zoch (2000)      | <i>Arch Intern Med</i> | Retrospective Cohort Study | 2   | USA            | 1983-1991 | 948   | 305   | 32.2 | Patients attended to by Cardiac Arrest Team |
| UK NCAA (2019)   |                        | Prospective Cohort Study   | 185 | United Kingdom | 2013-2018 | 90276 | 37328 | 41.4 | Patients attended to by Cardiac Arrest Team |

**Supplemental Table 3 – CHARMS-PF Checklist of Key Items in 23 Included Studies**  
(Adapted from Moons *et al.*, *PLoS Med*, 2014).

| <b>Source of data:</b>                                                              | <b>N (%)</b> |
|-------------------------------------------------------------------------------------|--------------|
| Case Control                                                                        | 0 (0.0)      |
| Observational Cohort                                                                | 17 (73.9)    |
| Randomized Trial                                                                    | 0 (0.0)      |
| Registry Data                                                                       | 6 (26.1)     |
| <b>Participants:</b>                                                                |              |
| Indicated participant eligibility and recruitment method                            | 23 (100.0)   |
| Provided participant description                                                    | 23 (100.0)   |
| Provided study dates                                                                | 23 (100.0)   |
| <b>Outcomes to be predicted:</b>                                                    |              |
| Definition and method for measurement of outcomes                                   | 23 (100.0)   |
| Was the same outcome definition used in all participants?                           | 23 (100.0)   |
| Were the outcomes assessed without knowledge of the candidate prognostic factors?   | 10 (43.5)    |
| Provided time of outcome occurrence or summary of duration of follow-up             | 23 (100.0)   |
| <b>Prognostic factors (index and comparator prognostic factors):</b>                |              |
| Indicated number and type of prognostic factors                                     | 23 (100.0)   |
| Provided definition and method for measurement of prognostic factors                | 23 (100.0)   |
| Timing of prognostic factor measurement (e.g. prior to IHCA, during IHCA, etc.)     | 23 (100.0)   |
| Were prognostic factors assessed blinded for outcome?                               | 10 (43.5)    |
| Specified handling of prognostic factors in analysis (e.g. continuous, categorized) | 23 (100.0)   |
| <b>Sample size:</b>                                                                 |              |
| Was a sample size calculation conducted and, if so, how?                            | 3 (13.0)     |
| Indicated number of participants and number of outcomes or events                   | 23 (100.0)   |
| Number of outcomes considered in relation to the number of prognostic factors       | 23 (100.0)   |
| <b>Missing data:</b>                                                                |              |
| Reported number of participants with any missing value                              | 17 (73.9)    |
| Reported number of participants with missing data for each prognostic factor        | 17 (73.9)    |
| Provided details of attrition                                                       | 11 (47.8)    |
| Reported handling of missing data                                                   | 15 (65.2)    |
| <b>Analysis:</b>                                                                    |              |
| Indicated modeling method utilized                                                  | 23 (100.0)   |
| Reported method for selection of factors for inclusion in multivariable model       | 23 (100.0)   |
| Reported method of handling each continuous prognostic factor                       | 16 (69.6)    |
| <b>Results:</b>                                                                     |              |
| Reported unadjusted and adjusted prognostic effect estimates                        | 23 (100.0)   |
| Provided the set of adjustment factors used                                         | 23 (100.0)   |
| <b>Interpretation and discussion:</b>                                               |              |
| Provided interpretation of presented results                                        | 23 (100.0)   |
| Compared results with other studies, including strengths and limitations            | 23 (100.0)   |

**Supplemental Table 4: Pre-Arrest Factors Evaluated in the 23 Included Cohorts.**

Abbreviations: ACS = Acute Coronary Syndrome; CHF = Congestive Heart Failure;  
CKD = Chronic Kidney Disease; COPD = Chronic Obstructive Pulmonary Disease

| Study            | Age ≥ 60 | Age ≥ 70 | Sex | Malignancy | CHF | CKD | COPD | Diabetes | ACS | Sepsis |
|------------------|----------|----------|-----|------------|-----|-----|------|----------|-----|--------|
| Al Dury (2017)   |          |          | x   |            |     |     |      |          |     |        |
| Ballew (1994)    |          |          |     |            |     |     |      |          |     |        |
| Bialecki (1995)  |          |          |     |            |     |     |      |          |     |        |
| Brady (2011)     |          |          |     |            |     |     |      |          |     |        |
| Brindley (2002)  |          |          | x   |            |     |     |      |          |     |        |
| Chan (2013)      |          |          |     |            |     |     |      |          |     |        |
| Chen (2016)      |          |          | x   |            |     |     |      |          |     |        |
| Cleverly (2013)  |          |          |     |            |     |     |      |          |     |        |
| Danciu (2004)    |          |          |     |            |     | x   |      |          |     |        |
| de Vos (1999)    |          | x        |     |            |     | x   |      |          |     |        |
| Doig (2000)      |          |          |     |            |     |     |      |          |     |        |
| Dumot (2001)     |          |          |     |            |     |     |      |          |     |        |
| Hessulf (2018)   |          |          |     | x          | x   | x   | x    |          | x   |        |
| Larkin (2010)    |          |          |     | x          |     | x   |      |          | x   | x      |
| Li (2018)        |          | x        |     |            |     |     |      |          |     |        |
| Marwick (1991)   | x        |          | x   |            |     |     |      |          |     |        |
| Meaney (2010)    |          |          |     |            |     |     |      |          |     |        |
| Ohlsson (2014)   |          |          |     | x          |     |     |      |          |     |        |
| Peberdy (2008)   |          |          |     |            |     |     |      |          |     |        |
| Shao (2016)      | x        |          | x   |            |     |     |      |          |     |        |
| Skrifvars (2007) |          |          | x   | x          |     | x   |      | x        |     |        |
| Zoch (2000)      |          |          |     |            |     |     |      |          |     |        |
| UK NCAA (2019)   | x        |          | x   |            |     |     |      |          |     |        |

**Supplemental Table 5: Intra-Arrest Factors Evaluated in the 23 Included Cohorts.**

Abbreviations: ACS = Acute Coronary Syndrome; CHF = Congestive Heart Failure;  
CKD = Chronic Kidney Disease; COPD = Chronic Obstructive Pulmonary Disease

| Study            | Witnessed | Monitored | Daytime | VT | VF | Asystole | PEA | Shockable | Intubation | Duration |
|------------------|-----------|-----------|---------|----|----|----------|-----|-----------|------------|----------|
| Al Dury (2017)   |           |           |         |    |    |          |     |           |            |          |
| Ballew (1994)    |           |           |         | x  |    | x        |     |           |            |          |
| Bialecki (1995)  |           |           |         |    |    | x        |     |           | x          | x        |
| Brady (2011)     | x         | x         |         |    |    |          |     |           |            |          |
| Brindley (2002)  |           |           | x       |    |    |          |     |           |            |          |
| Chan (2013)      |           | x         |         |    |    |          |     | x         |            |          |
| Chen (2016)      |           |           |         |    |    |          |     | x         |            |          |
| Cleverly (2013)  | x         | x         |         | x  | x  | x        | x   |           |            |          |
| Danciu (2004)    |           |           |         |    |    |          |     | x         |            |          |
| de Vos (1999)    |           |           |         |    |    |          |     | x         |            |          |
| Doig (2000)      |           |           |         |    |    |          |     | x         |            |          |
| Dumot (2001)     |           |           |         |    |    |          |     |           | x          |          |
| Hessulf (2018)   | x         | x         | x       |    |    |          |     | x         | x          |          |
| Larkin (2010)    | x         | x         |         | x  | x  |          |     |           | x          |          |
| Li (2018)        |           |           |         |    |    |          |     | x         |            |          |
| Marwick (1991)   |           |           |         |    | x  |          |     |           | x          |          |
| Meaney (2010)    |           | x         |         |    |    |          |     | x         |            |          |
| Ohlsson (2014)   |           | x         |         |    |    |          |     | x         |            |          |
| Peberdy (2008)   |           | x         | x       |    |    |          |     |           |            |          |
| Shao (2016)      |           |           |         |    |    |          |     | x         |            |          |
| Skrifvars (2007) | x         |           | x       |    |    |          |     | x         |            |          |
| Zoch (2000)      |           | x         |         |    |    |          |     |           |            |          |
| UK NCAA (2019)   |           |           | x       | x  | x  | x        | x   | x         |            | x        |

**Supplemental Table 6: Prognostic Factors Included in Adjustment for Mortality in the 23 Included Cohorts.** Abbreviations: CPR = Cardiopulmonary resuscitation; STEMI = ST-Elevation Myocardial Infarction

| <b>Study – Author (Year)</b> | <b>Prognostic Factors Included in Adjusted Analyses</b>                                                                                                                                                                                                            |
|------------------------------|--------------------------------------------------------------------------------------------------------------------------------------------------------------------------------------------------------------------------------------------------------------------|
| Al Dury (2017)               | age; sex; initial rhythm, etiology of arrest; comorbidities                                                                                                                                                                                                        |
| Ballew (1994)                | age; sex; initial rhythm; etiology of arrest                                                                                                                                                                                                                       |
| Bialecki (1995)              | age; sex; initial rhythm; etiology of arrest; location of arrest; event duration; intubation; laboratory values                                                                                                                                                    |
| Brady (2011)                 | age; sex; initial rhythm; etiology of arrest; ethnicity; time of day; weekend; illness category; location; comorbidities; pharmacological interventions; time to first shock; event duration; interval between admit and event; total number of arrests this visit |
| Brindley (2002)              | age; sex; initial rhythm; etiology of arrest; location; witnessed arrest                                                                                                                                                                                           |
| Chan (2013)                  | age; sex; initial rhythm; etiology of arrest; location; witnessed arrest; time of day; intubation; pharmacological interventions                                                                                                                                   |
| Chen (2016)                  | age; sex; initial rhythm; pharmacological interventions; event duration                                                                                                                                                                                            |
| Cleverly (2013)              | age; sex; initial rhythm; time of day                                                                                                                                                                                                                              |
| Danciu (2004)                | age; sex; initial rhythm; etiology of arrest; witnessed arrest; time of day; event duration                                                                                                                                                                        |
| de Vos (1999)                | age; sex; initial rhythm; comorbidities; functional status before admission                                                                                                                                                                                        |
| Doig (2000)                  | age; sex; initial rhythm; etiology of arrest; witnessed arrest; pharmacological interventions; time to defibrillation; functional status                                                                                                                           |
| Dumot (2001)                 | age; sex; initial rhythm, time of day; event duration; intubation; pharmacological interventions;                                                                                                                                                                  |
| Hessulf (2018)               | age; sex; initial rhythm; etiology of arrest; location; time of day; comorbidities; witnessed arrest; monitored                                                                                                                                                    |
| Larkin (2010)                | age; sex; initial rhythm; comorbidities; location; intubation; pharmacological interventions; witnessed arrest; monitored; total number of arrests this visit                                                                                                      |
| Li (2018)                    | age; sex; initial rhythm; location; event duration; smoker; prior percutaneous coronary intervention                                                                                                                                                               |
| Marwick (1991)               | age; sex; initial rhythm; location; witnessed; pharmacological interventions; time to CPR; time to defibrillation                                                                                                                                                  |
| Meaney (2010)                | age; sex; initial rhythm; location; witnessed; monitored; pharmacological interventions                                                                                                                                                                            |
| Ohlsson (2014)               | age; sex; initial rhythm; heart rate; STEMI                                                                                                                                                                                                                        |
| Peberdy (2008)               | age; sex; initial rhythm; location; witnessed; monitored; pharmacological interventions; duration of event; delay in CPR; hospital size; use of epinephrine                                                                                                        |
| Shao (2016)                  | age; sex; initial rhythm; location; delay in CPR                                                                                                                                                                                                                   |
| Skrifvars (2007)             | age; sex; initial rhythm; etiology of arrest; witnessed; time of day; location; comorbidities;                                                                                                                                                                     |
| Zoch (2000)                  | age; sex; initial rhythm; etiology of arrest; location; monitored                                                                                                                                                                                                  |
| UK NCAA (2019)               | age; sex; initial rhythm; time of day; location;                                                                                                                                                                                                                   |

**Supplemental Table 7: QUIPS Quality Assessment for Risk of Bias of the 23 Included Cohorts.** Abbreviations: PF = Prognostic Factor; ROB = Risk of bias

| <b>Study</b>     | <b>Study Participation</b> | <b>Study Attrition</b> | <b>PF Measurement</b> | <b>Outcome Measurement</b> | <b>Adjustment</b> | <b>Statistical Reporting</b> |
|------------------|----------------------------|------------------------|-----------------------|----------------------------|-------------------|------------------------------|
| Al Dury (2017)   | Low ROB                    | Low ROB                | Low ROB               | Low ROB                    | Low ROB           | Low ROB                      |
| Ballew (1994)    | Low ROB                    | Moderate ROB           | Low ROB               | Low ROB                    | Low ROB           | Moderate ROB                 |
| Bialecki (1995)  | Low ROB                    | Low ROB                | Low ROB               | Low ROB                    | Low ROB           | Low ROB                      |
| Brady (2011)     | Low ROB                    | Low ROB                | Low ROB               | Low ROB                    | Low ROB           | Low ROB                      |
| Brindley (2002)  | Moderate ROB               | Low ROB                | Low ROB               | Low ROB                    | Low ROB           | Low ROB                      |
| Chan (2013)      | Low ROB                    | Low ROB                | Low ROB               | Low ROB                    | Low ROB           | Low ROB                      |
| Chen (2016)      | Low ROB                    | Low ROB                | Low ROB               | Low ROB                    | Low ROB           | Low ROB                      |
| Cleverly (2013)  | Moderate ROB               | Moderate ROB           | Low ROB               | Low ROB                    | Low ROB           | Moderate ROB                 |
| Danciu (2004)    | Low ROB                    | Low ROB                | Low ROB               | Low ROB                    | Low ROB           | Low ROB                      |
| de Vos (1999)    | Low ROB                    | Low ROB                | Low ROB               | Low ROB                    | Low ROB           | Low ROB                      |
| Doig (2000)      | Low ROB                    | Low ROB                | Low ROB               | Low ROB                    | Low ROB           | Low ROB                      |
| Dumot (2001)     | Low ROB                    | Low ROB                | Low ROB               | Low ROB                    | Low ROB           | Low ROB                      |
| Hessulf (2018)   | Low ROB                    | Low ROB                | Low ROB               | Low ROB                    | Low ROB           | Low ROB                      |
| Larkin (2010)    | Low ROB                    | Low ROB                | Low ROB               | Low ROB                    | Low ROB           | Low ROB                      |
| Li (2018)        | Moderate ROB               | Low ROB                | Low ROB               | Low ROB                    | Low ROB           | Low ROB                      |
| Marwick (1991)   | Low ROB                    | Low ROB                | Low ROB               | Low ROB                    | Low ROB           | Low ROB                      |
| Meaney (2010)    | Low ROB                    | Low ROB                | Low ROB               | Low ROB                    | Low ROB           | Low ROB                      |
| Ohlsson (2014)   | Low ROB                    | Low ROB                | Low ROB               | Low ROB                    | Low ROB           | Low ROB                      |
| Peberdy (2008)   | Low ROB                    | Low ROB                | Low ROB               | Low ROB                    | Low ROB           | Low ROB                      |
| Shao (2016)      | Low ROB                    | Low ROB                | Low ROB               | Low ROB                    | Low ROB           | Low ROB                      |
| Skrifvars (2007) | Low ROB                    | Low ROB                | Low ROB               | Low ROB                    | Low ROB           | Low ROB                      |
| Zoch (2000)      | Low ROB                    | Low ROB                | Low ROB               | Low ROB                    | Low ROB           | Low ROB                      |
| UK NCAA (2019)   | Moderate ROB               | Low ROB                | Low ROB               | Low ROB                    | Low ROB           | Low ROB                      |

**Supplemental Table 8: GRADE Certainty of Prognostic Estimates – Pre-Arrest Factors** (Adapted from Iorio *et al.*, *BMJ*, 2015).

| Nº of studies                       | Certainty assessment  |                          |                          |              |                      |                      | impact                                      | Certainty        | Importance |
|-------------------------------------|-----------------------|--------------------------|--------------------------|--------------|----------------------|----------------------|---------------------------------------------|------------------|------------|
|                                     | Study design          | Risk of bias             | Inconsistency            | Indirectness | Imprecision          | Other considerations |                                             |                  |            |
| Male sex                            |                       |                          |                          |              |                      |                      |                                             |                  |            |
| 7                                   | observational studies | not serious <sup>a</sup> | not serious <sup>b</sup> | not serious  | serious <sup>c</sup> | none                 | Pooled Odds Ratio = 0.84 (95% CI 0.73-0.95) | ⊕⊕⊕○<br>MODERATE | CRITICAL   |
| Age                                 |                       |                          |                          |              |                      |                      |                                             |                  |            |
| 5                                   | observational studies | serious <sup>d</sup>     | not serious <sup>b</sup> | not serious  | serious <sup>c</sup> | none                 | Pooled Odds Ratio = 0.42 (95% CI 0.18-0.99) | ⊕⊕○○<br>LOW      | CRITICAL   |
| History of Malignancy               |                       |                          |                          |              |                      |                      |                                             |                  |            |
| 4                                   | observational studies | not serious              | not serious <sup>b</sup> | not serious  | not serious          | none                 | Pooled Odds Ratio = 0.57 (95% CI 0.45-0.71) | ⊕⊕⊕⊕<br>HIGH     | CRITICAL   |
| History of Congestive Heart Failure |                       |                          |                          |              |                      |                      |                                             |                  |            |
| 1                                   | observational studies | not serious              | not serious              | not serious  | serious <sup>e</sup> | none                 | Pooled Odds Ratio = 0.62 (95% CI 0.56-0.68) | ⊕⊕⊕○<br>MODERATE | CRITICAL   |
| History of Chronic Kidney Disease   |                       |                          |                          |              |                      |                      |                                             |                  |            |
| 5                                   | observational studies | not serious              | not serious <sup>b</sup> | not serious  | not serious          | none                 | Pooled Odds Ratio = 0.56 (95% CI 0.40-0.78) | ⊕⊕⊕⊕<br>HIGH     | CRITICAL   |

## Survival Following In-Hospital Cardiac Arrest - Systematic Review – Supplement

| Nº of studies                                    | Certainty assessment  |              |                      |              |                      |                      | impact                                      | Certainty        | Importance |
|--------------------------------------------------|-----------------------|--------------|----------------------|--------------|----------------------|----------------------|---------------------------------------------|------------------|------------|
|                                                  | Study design          | Risk of bias | Inconsistency        | Indirectness | Imprecision          | Other considerations |                                             |                  |            |
| History of Chronic Obstructive Pulmonary Disease |                       |              |                      |              |                      |                      |                                             |                  |            |
| 1                                                | observational studies | not serious  | not serious          | not serious  | serious <sup>e</sup> | none                 | Pooled Odds Ratio = 0.65 (95% CI 0.58-0.72) | ⊕⊕⊕○<br>MODERATE | CRITICAL   |
| History of Diabetes Mellitus                     |                       |              |                      |              |                      |                      |                                             |                  |            |
| 1                                                | observational studies | not serious  | not serious          | not serious  | serious <sup>e</sup> | none                 | Pooled Odds Ratio = 0.53 (95% CI 0.34-0.83) | ⊕⊕⊕○<br>MODERATE | CRITICAL   |
| Diagnosis of Acute Coronary Syndrome             |                       |              |                      |              |                      |                      |                                             |                  |            |
| 2                                                | observational studies | not serious  | serious <sup>f</sup> | not serious  | serious <sup>c</sup> | none                 | Pooled Odds Ratio = 0.70 (95% CI 0.28-1.78) | ⊕⊕○○<br>LOW      | CRITICAL   |
| Diagnosis of Sepsis                              |                       |              |                      |              |                      |                      |                                             |                  |            |
| 1                                                | observational studies | not serious  | not serious          | not serious  | serious <sup>e</sup> | none                 | Pooled Odds Ratio = 0.80 (95% CI 0.70-0.91) | ⊕⊕⊕○<br>MODERATE | CRITICAL   |

### Explanations

- The majority of weight in pooled estimate (>65%) comes from low RoB studies, the one moderate RoB study is consistent with the others.
- Despite a high I-squared there is high degree of overlap amongst point estimates and confidence intervals.
- Wide confidence intervals do not rule out important prognostic factor or no impact of this factor.
- Majority of pooled estimate weight comes from studies at moderate RoB.
- Small amount of study data and studies reporting on this variable.
- High I-squared with non-overlapping point estimates and discrepant findings amongst included studies.



**Supplemental Table 9: GRADE Certainty of Prognostic Estimates – Intra-Arrest Factors** (Adapted from Iorio *et al.*, *BMJ*, 2015).

| Nº of studies                   | Certainty assessment  |                          |                          |                      |             |                      | impact                                      | Certainty        | Importance |
|---------------------------------|-----------------------|--------------------------|--------------------------|----------------------|-------------|----------------------|---------------------------------------------|------------------|------------|
|                                 | Study design          | Risk of bias             | Inconsistency            | Indirectness         | Imprecision | Other considerations |                                             |                  |            |
| Witnessed Arrest                |                       |                          |                          |                      |             |                      |                                             |                  |            |
| 5                               | observational studies | not serious <sup>a</sup> | not serious <sup>b</sup> | not serious          | not serious | none                 | Pooled Odds Ratio = 2.46 (95% CI 1.75-3.45) | ⊕⊕⊕⊕<br>HIGH     | CRITICAL   |
| Monitored Patient               |                       |                          |                          |                      |             |                      |                                             |                  |            |
| 9                               | observational studies | not serious <sup>a</sup> | not serious <sup>b</sup> | not serious          | not serious | none                 | Pooled Odds Ratio = 1.84 (95% CI 1.44-2.36) | ⊕⊕⊕⊕<br>HIGH     | CRITICAL   |
| Arrest during 'Daytime' Hours   |                       |                          |                          |                      |             |                      |                                             |                  |            |
| 6                               | observational studies | not serious <sup>a</sup> | not serious <sup>b</sup> | not serious          | not serious | none                 | Pooled Odds Ratio = 1.39 (95% CI 1.19-1.61) | ⊕⊕⊕⊕<br>HIGH     | CRITICAL   |
| Initial Shockable Rhythm        |                       |                          |                          |                      |             |                      |                                             |                  |            |
| 13                              | observational studies | not serious <sup>a</sup> | not serious <sup>b</sup> | not serious          | not serious | strong association   | Pooled Odds Ratio = 4.80 (95% CI 3.47-6.64) | ⊕⊕⊕⊕<br>HIGH     | CRITICAL   |
| Intubation During Resuscitation |                       |                          |                          |                      |             |                      |                                             |                  |            |
| 5                               | observational studies | not serious              | not serious <sup>b</sup> | serious <sup>c</sup> | not serious | none                 | Pooled Odds Ratio = 0.54                    | ⊕⊕⊕○<br>MODERATE | CRITICAL   |

Survival Following In-Hospital Cardiac Arrest - Systematic Review – Supplement

| Nº of studies                          | Certainty assessment  |                      |               |              |             |                      | impact                                      | Certainty    | Importance |
|----------------------------------------|-----------------------|----------------------|---------------|--------------|-------------|----------------------|---------------------------------------------|--------------|------------|
|                                        | Study design          | Risk of bias         | Inconsistency | Indirectness | Imprecision | Other considerations |                                             |              |            |
|                                        |                       |                      |               |              |             |                      | (95% CI 0.42-0.70)                          |              |            |
| Duration of Resuscitation > 15 minutes |                       |                      |               |              |             |                      |                                             |              |            |
| 2                                      | observational studies | serious <sup>d</sup> | not serious   | not serious  | not serious | strong association   | Pooled Odds Ratio = 0.12 (95% CI 0.07-0.19) | ⊕⊕⊕⊕<br>HIGH | CRITICAL   |

*Explanations*

- a. The majority of pooled estimate weight comes from low risk of bias studies. The one moderate risk of bias study is consistent with the low risk of bias studies.
- b. Despite a high I-squared there is high degree of overlap between point estimates and confidence intervals.
- c. Variable timing of intubation, unclear other confounding variables contributing to whether patient is intubated or not.
- d. The majority of pooled estimate weight comes from data at moderate risk of bias.

**Supplemental Table 10: CHARMS-PF Checklist Detailed Characteristics of the 30 Studies with Unadjusted Values Only**

(Adapted from Riley *et al.*, *BMJ*, 2019). Abbreviations: CPR = Cardiopulmonary Resuscitation; ED = Emergency Department; ICU = Intensive Care Unit; IHCA = In-Hospital Cardiac Arrest OHCA = Out-of-Hospital Cardiac Arrest; OR = Operating Room

| Author (Year)     | Journal              | Type of Study              | Sites | Country   | Years     | Sample Size | Survived to Hospital Discharge | % Survival | Inclusion Criteria                                                      | Exclusion Criteria                                             |
|-------------------|----------------------|----------------------------|-------|-----------|-----------|-------------|--------------------------------|------------|-------------------------------------------------------------------------|----------------------------------------------------------------|
| Andersen (2017)   | <i>JAMA</i>          | Prospective Cohort Study   | 668   | USA       | 2000-2014 | 108079      | 24256                          | 22.4       | Adult patients experiencing cardiac arrest in-hospital                  |                                                                |
| Andreasson (1998) | <i>Resuscitation</i> | Prospective Cohort Study   | 1     | Sweden    | 1994-1995 | 170         | 73                             | 42.9       | ≥ 18 years, arrested and received CPR in-hospital                       |                                                                |
| Bedell (1983)     | <i>N Engl J Med</i>  | Prospective Cohort Study   | 1     | USA       | 1981-1982 | 294         | 41                             | 13.9       | Adult patients with attempt at CPR following cardiac arrest in-hospital |                                                                |
| Cohn (2004)       | <i>Int Med J</i>     | Retrospective Cohort Study | 1     | Australia | 2001-2003 | 105         | 22                             | 21.0       | ≥ 18, received CPR                                                      | Admitted to ICU, non-ward location (ED, OR), incomplete record |

## Survival Following In-Hospital Cardiac Arrest - Systematic Review – Supplement

|                 |                         |                            |   |                |           |      |     |      |                                                                         |                                      |
|-----------------|-------------------------|----------------------------|---|----------------|-----------|------|-----|------|-------------------------------------------------------------------------|--------------------------------------|
| Cooper (2006)   | <i>Resuscitation</i>    | Retrospective Cohort Study | 1 | United Kingdom | 1993-2003 | 2121 | 338 | 15.9 | Adult patients with in-hospital resuscitation following cardiac arrest  | Age < 20, 'Do Not Resuscitate' order |
| Dodek (1998)    | <i>Resuscitation</i>    | Retrospective Cohort Study | 1 | Canada         | 1989-1990 | 271  | 69  | 25.5 | Adult patients with attempt at CPR following cardiac arrest in-hospital | Identified from CPR log at hospital  |
| Ebell (1997)    | <i>Med Decis Making</i> | Retrospective Cohort Study | 3 | USA            | 1992-1993 | 656  | 35  | 5.3  | Consecutive patients requiring CPR in-hospital                          |                                      |
| George (1989)   | <i>Am J Med</i>         | Prospective Cohort Study   | 1 | USA            | 1985      | 140  | 34  | 24.3 |                                                                         |                                      |
| Huang (2002)    | <i>Resuscitation</i>    | Retrospective Cohort Study | 1 | Taiwan         | 1999-2000 | 103  | 18  | 17.5 |                                                                         | Age <17, OHCA                        |
| Karetzky (1995) | <i>Arch Intern Med</i>  | Retrospective Cohort Study | 1 | USA            | 1990-1992 | 668  | 55  | 8.2  | Patients 18 years or older, suffering IHCA, receiving CPR               | Ventilation without compressions     |

## Survival Following In-Hospital Cardiac Arrest - Systematic Review – Supplement

|                 |                          |                            |     |             |           |        |       |      |                                                                         |                               |
|-----------------|--------------------------|----------------------------|-----|-------------|-----------|--------|-------|------|-------------------------------------------------------------------------|-------------------------------|
| Marik (1997)    | <i>J Crit Care</i>       | Retrospective Cohort Study | 1   | USA         | 1991-1995 | 308    | 41    | 13.3 | Adult patients with attempt at CPR following cardiac arrest in-hospital |                               |
| Ofoma (2018)    | <i>J Am Coll Cardiol</i> | Prospective Cohort Study   | 470 | USA         | 2000-2014 | 151071 | 28097 | 18.6 | Adult patients experiencing cardiac arrest in-hospital                  |                               |
| O'Keeffe (1991) | <i>Q J Med</i>           | Retrospective Cohort Study | 1   | Ireland     |           | 274    | 25    | 9.1  | All patients receiving CPR in-hospital                                  |                               |
| Patrick (1998)  | <i>Resuscitation</i>     | Prospective Cohort Study   | 1   | New Zealand | 1995-1996 | 133    | 35    | 26.3 | Prospectively enrolled following cardiac arrest                         |                               |
| Peters (2007)   | <i>Am J Crit Care</i>    | Prospective Cohort Study   | 1   | Australia   | 2004      | 128    | 41    | 32.0 | Patients attended to by Cardiac Arrest Team, Loss of pulse              | OHCA, respiratory arrest, DNR |
| Piscator (2016) | <i>Resuscitation</i>     | Retrospective Cohort Study | 1   | Sweden      | 2014      | 174    | 41    | 23.6 | All cases identified through the hospital's cardiac arrest sheet        |                               |

## Survival Following In-Hospital Cardiac Arrest - Systematic Review – Supplement

|                  |                        |                            |    |         |           |      |     |      |                                                                        |                                             |
|------------------|------------------------|----------------------------|----|---------|-----------|------|-----|------|------------------------------------------------------------------------|---------------------------------------------|
| Radeschi (2017)  | <i>Resuscitation</i>   | Prospective Cohort Study   | 36 | Italy   | 2011-2014 | 1539 | 228 | 14.8 | Adult patients with in-hospital resuscitation following cardiac arrest | OHCA                                        |
| Rakic (2005)     | <i>Croat Med J</i>     | Prospective Cohort Study   | 1  | Croatia | 2003      | 120  | 27  | 22.5 | Patients attended to by Cardiac Arrest Team                            |                                             |
| Roberts (1990)   | <i>Chest</i>           | Retrospective Cohort Study | 1  | Canada  | 1985-1986 | 310  | 30  | 9.7  | All patients receiving CPR in-hospital                                 | Arrests occurring the ER, OR                |
| Robinson (1994)  | <i>Chest</i>           | Retrospective Cohort Study | 1  | USA     | 1989      | 83   | 24  | 28.9 | Patients 18 years or older, suffering IHCA, receiving CPR              | Arrests occurring the ER, OR; OHCA          |
| Rosenberg (1992) | <i>Arch Intern Med</i> | Retrospective Cohort Study | 2  | USA     | 1988-1989 | 300  | 70  | 23.3 | Absence of pulse and initiation of CPR                                 | Arrests occurring the ER, OR; OHCA; Seizure |
| Rozenbaum (1988) | <i>Crit Care Med</i>   | Prospective Cohort Study   | 1  | Israel  | 1986      | 71   | 13  | 18.3 | Patients 18 years or older, suffering IHCA, receiving CPR              | Repeat arrests                              |

## Survival Following In-Hospital Cardiac Arrest - Systematic Review – Supplement

|                  |                                            |                            |   |                |           |     |    |      |                                                                              |                              |
|------------------|--------------------------------------------|----------------------------|---|----------------|-----------|-----|----|------|------------------------------------------------------------------------------|------------------------------|
| Sandroni (2004)  | <i>Resuscitation</i>                       | Prospective Cohort Study   | 1 | Italy          | 2000-2002 | 114 | 37 | 32.5 | >18; Patients attended to by Cardiac Arrest Team                             | OHCA; OR; outpatient         |
| Schultz (1996)   | <i>Resuscitation</i>                       | Retrospective Cohort Study | 1 | USA            | 1988-1991 | 266 | 24 | 9.0  | Patients 18 years or older, suffering IHCA, receiving CPR                    |                              |
| Skogvoll (1999)  | <i>Acta Anaesthesiologica Scandinavica</i> | Retrospective Cohort Study | 1 | Norway         | 1990-1994 | 244 | 43 | 17.6 | Patients attended to by Cardiac Arrest Team                                  |                              |
| Sowden (1984)    | <i>Anaesthesia</i>                         | Retrospective Cohort Study | 1 | United Kingdom |           | 108 | 23 | 21.3 | Patients experiencing cardiac arrest in-hospital                             |                              |
| Taffett (1988)   | <i>JAMA</i>                                | Retrospective Cohort Study | 1 | USA            | 1984-1985 | 399 | 22 | 5.5  | Patients experiencing cardiac arrest in-hospital                             |                              |
| Tortolani (1990) | <i>Resuscitation</i>                       | Retrospective Cohort Study | 1 | USA            |           | 470 | 68 | 14.5 | Patients attended to by Cardiac Arrest Team; unresponsive; apneic; pulseless | Respiratory arrests; syncope |

Survival Following In-Hospital Cardiac Arrest - Systematic Review – Supplement

|                     |                        |                          |   |        |           |      |     |      |                                                  |                                                                                                                 |
|---------------------|------------------------|--------------------------|---|--------|-----------|------|-----|------|--------------------------------------------------|-----------------------------------------------------------------------------------------------------------------|
| van Walraven (1999) | <i>Arch Intern Med</i> | Prospective Cohort Study | 5 | Canada | 1989-1995 | 1077 | 103 | 9.6  | Patients experiencing cardiac arrest in-hospital | <16; Terminal illness; Absence of CPR >15 mins from arrest; trauma; exanguination; OR; detectable pulse<br>NICU |
| van Walraven (2000) | <i>JAMA</i>            | Prospective Cohort Study | 1 | USA    | 1987-1996 | 2181 | 327 | 15.0 | Patients experiencing cardiac arrest in-hospital |                                                                                                                 |



**Supplemental Table 11: Results of Meta-Analysis of Unadjusted Analyses for Prediction of Survival Following In-Hospital Cardiac Arrest.** Abbreviations: CHF = Congestive Heart Failure; CI = confidence interval; COPD = Chronic Obstructive Pulmonary Disease; OR = Odds ratio

|                                   | Studies            | OR                   | 95% CI                    | <i>P</i> † | <i>I</i> <sup>2</sup> |
|-----------------------------------|--------------------|----------------------|---------------------------|------------|-----------------------|
| <b>Pre-Arrest Factors</b>         |                    |                      |                           |            |                       |
| <b>Demographics</b>               |                    |                      |                           |            |                       |
| Male Sex                          | 29                 | 1.01                 | 0.93-1.10                 | 0.810      | 61%                   |
| Age ≥ 60                          | 10                 | 0.52                 | 0.37-0.71                 | <0.001     | 98%                   |
| Age ≥ 70                          | 12                 | 0.41                 | 0.30-0.55                 | <0.001     | 66%                   |
| <b>Comorbidities at Admission</b> |                    |                      |                           |            |                       |
| Active Malignancy                 | 17                 | 0.51                 | 0.42-0.62                 | <0.001     | 50%                   |
| CHF                               | 10                 | 0.83                 | 0.62-1.10                 | 0.200      | 92%                   |
| Chronic Kidney Disease            | 14                 | 0.64                 | 0.49-0.85                 | 0.002      | 90%                   |
| COPD                              | 6                  | 0.92                 | 0.50-1.70                 | 0.260      | 79%                   |
| Diabetes Mellitus                 | 9                  | 0.85                 | 0.71-1.03                 | 0.090      | 77%                   |
| <b>Admission Diagnosis</b>        |                    |                      |                           |            |                       |
| Acute Coronary Syndrome           | 10                 | 1.17                 | 0.80-1.72                 | 0.410      | 96%                   |
| Sepsis                            | 8                  | 0.49                 | 0.29-0.83                 | 0.009      | 46%                   |
| <b>Intra-Arrest Factors</b>       |                    |                      |                           |            |                       |
| Witnessed Arrest                  | 18                 | 4.04                 | 2.94-5.55                 | <0.001     | 84%                   |
| Monitored Patient                 | <a href="#">14</a> | <a href="#">2.28</a> | <a href="#">1.58-3.28</a> | <0.001     | 97%                   |
| Arrest During Daytime Hours       | 13                 | 1.45                 | 1.27-1.67                 | <0.001     | 96%                   |
| Ventricular Tachycardia           | 11                 | 3.82                 | 2.76-5.28                 | <0.001     | 95%                   |
| Ventricular Fibrillation          | 11                 | 3.47                 | 2.69-4.47                 | <0.001     | 94%                   |
| Asystole                          | 21                 | 0.35                 | 0.31-0.41                 | <0.001     | 72%                   |
| Pulseless Electrical Activity     | 19                 | 0.43                 | 0.36-0.50                 | <0.001     | 80%                   |
| Shockable Rhythm                  | 38                 | 5.77                 | 5.03-6.61                 | <0.001     | 87%                   |
| Intubation During Arrest          | 10                 | 0.17                 | 0.10-0.29                 | <0.001     | 87%                   |
| Resuscitation Duration ≥ 15 min.  | 8                  | 0.14                 | 0.10-0.20                 | <0.001     | 78%                   |

†: *P*-values obtained from the test for overall effect.

**Supplemental Figure 2: Forest Plots of Adjusted and Unadjusted Analyses for Association Between Male Sex and Survival Following In-Hospital Cardiac Arrest.** Abbreviations: CI = Confidence Interval; OR = Odds Ratio; SE = Standard Error

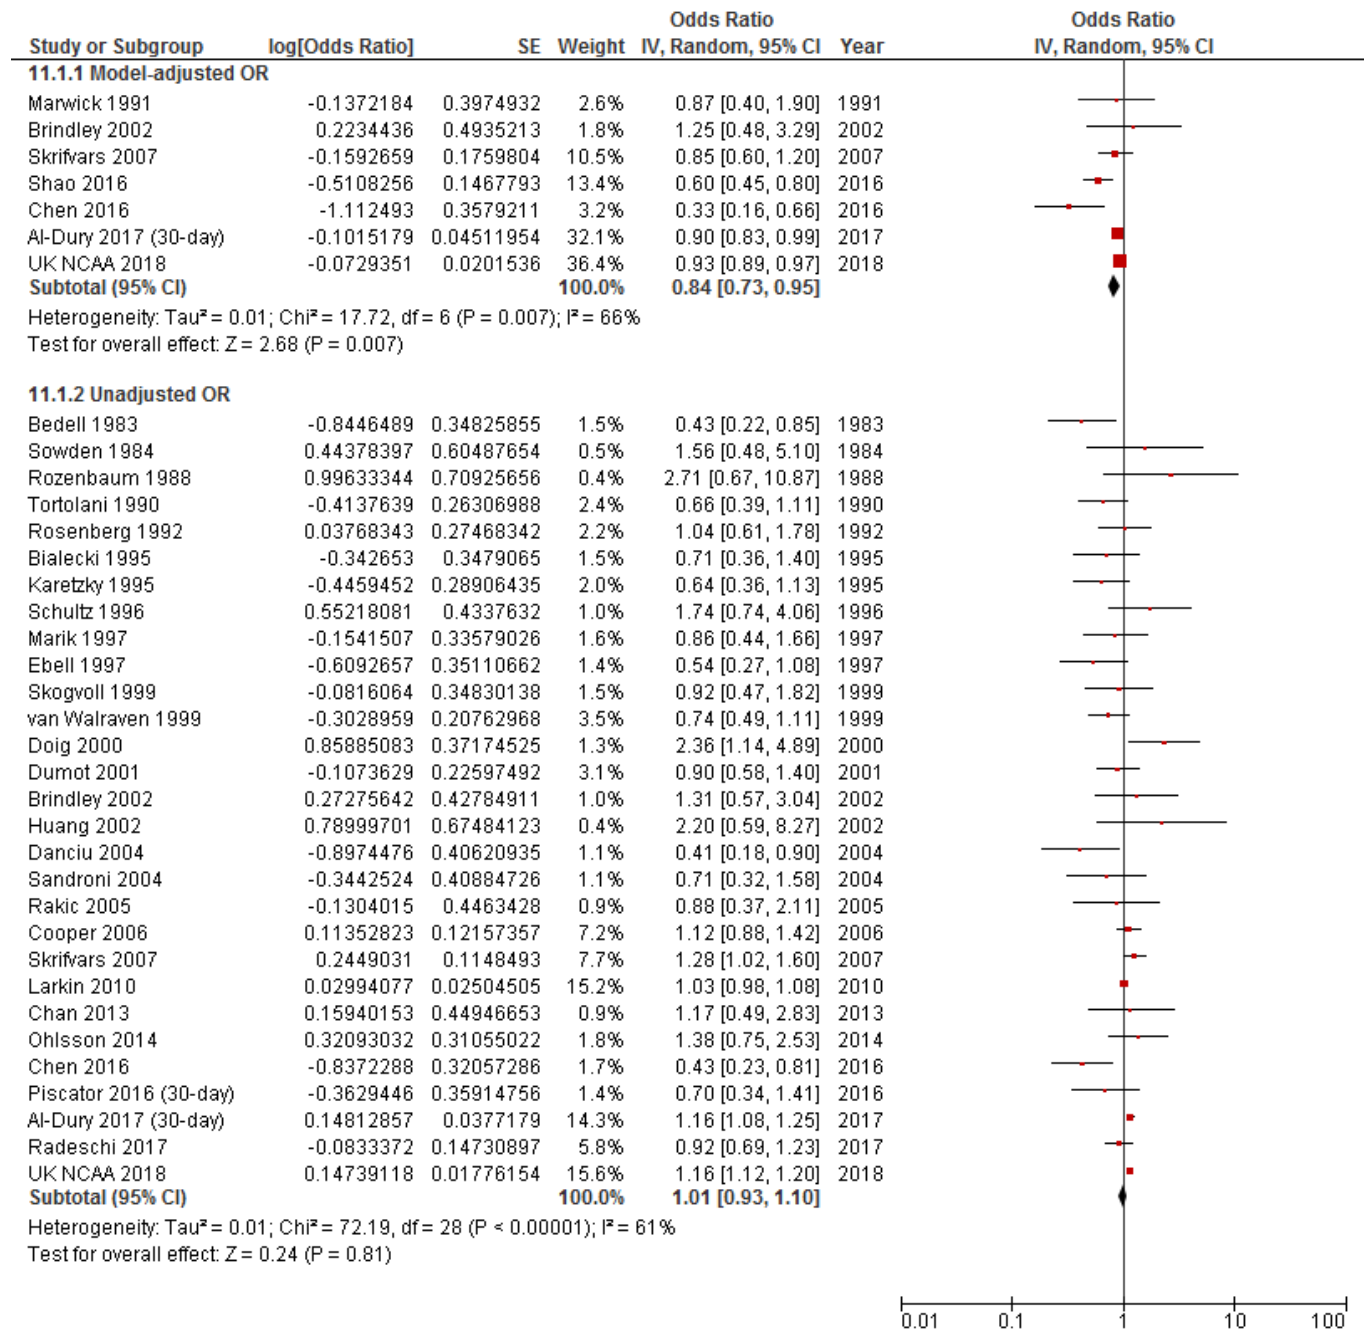

Test for subgroup differences: Chi<sup>2</sup> = 5.63, df = 1 (P = 0.02), I<sup>2</sup> = 82.2%

**Supplemental Figure 3: Forest Plots of Adjusted and Unadjusted Analyses for Association Between Age and Survival Following In-Hospital Cardiac Arrest.** Abbreviations: CI = Confidence Interval; OR = Odds Ratio; SE = Standard Error

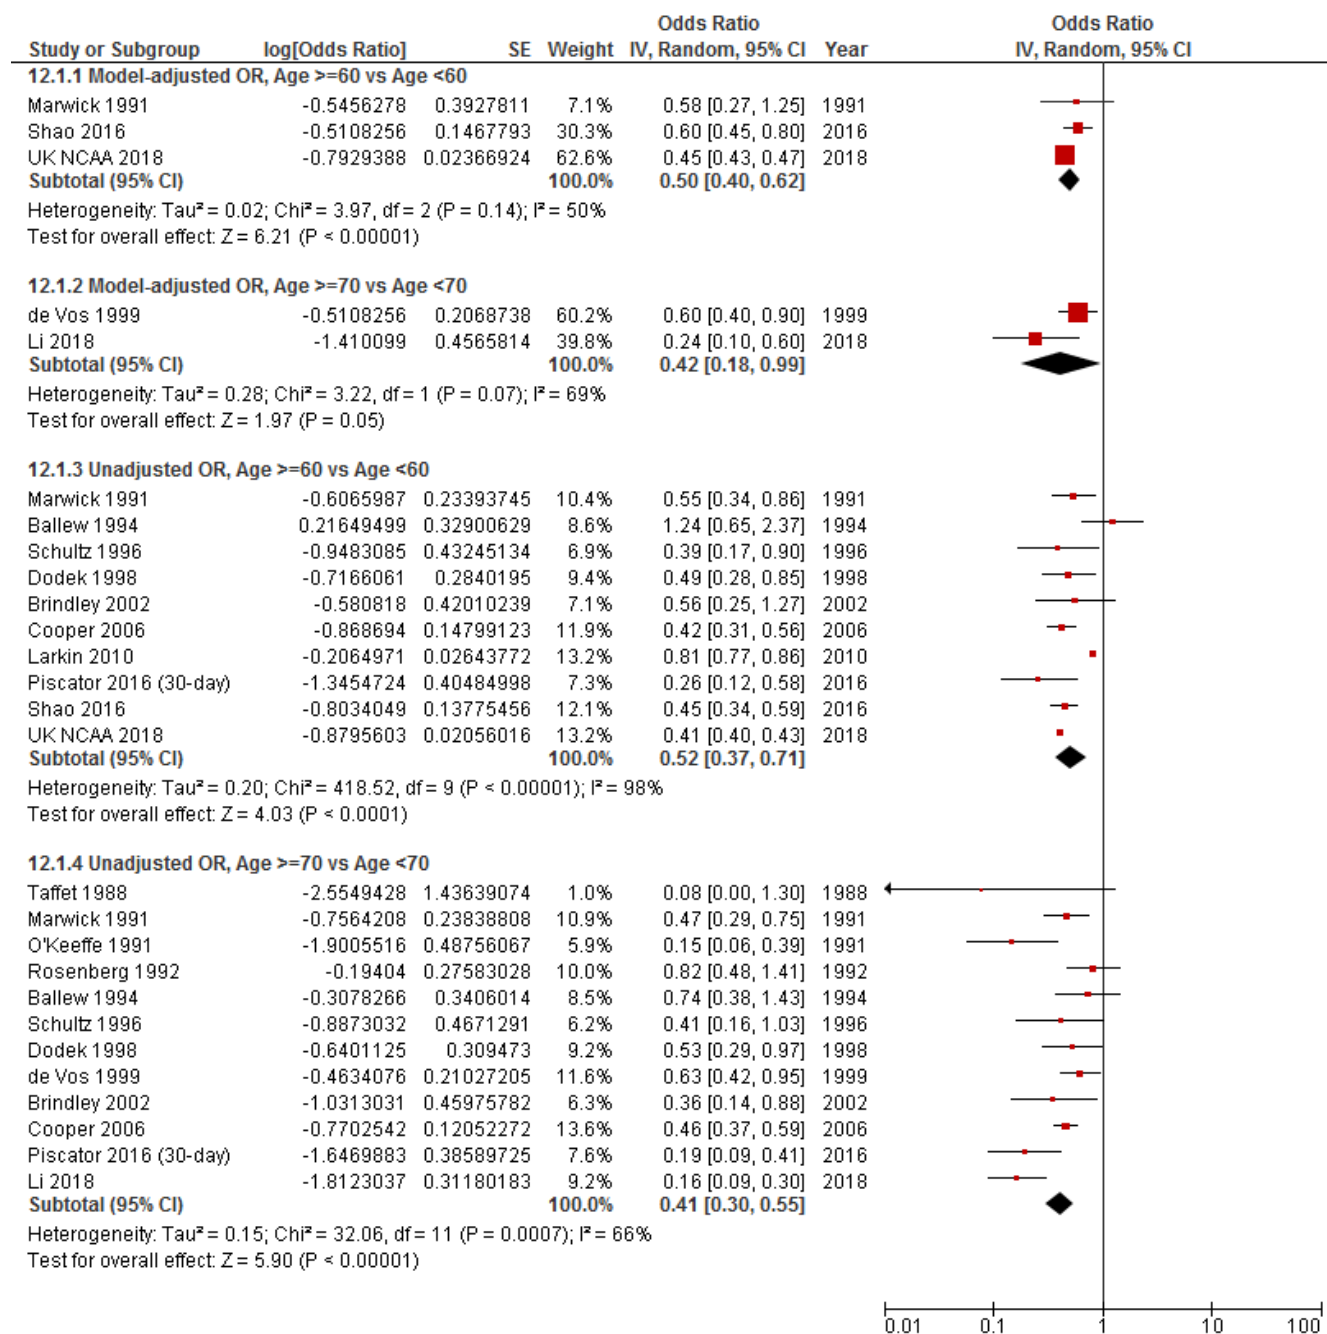

Test for subgroup differences: Chi<sup>2</sup> = 1.57, df = 3 (P = 0.67), I<sup>2</sup> = 0%

**Supplemental Figure 4: Forest Plots of Adjusted and Unadjusted Analyses for Association Between Malignancy and Survival Following In-Hospital Cardiac Arrest.** Abbreviations: CI = Confidence Interval; OR = Odds Ratio; SE = Standard Error

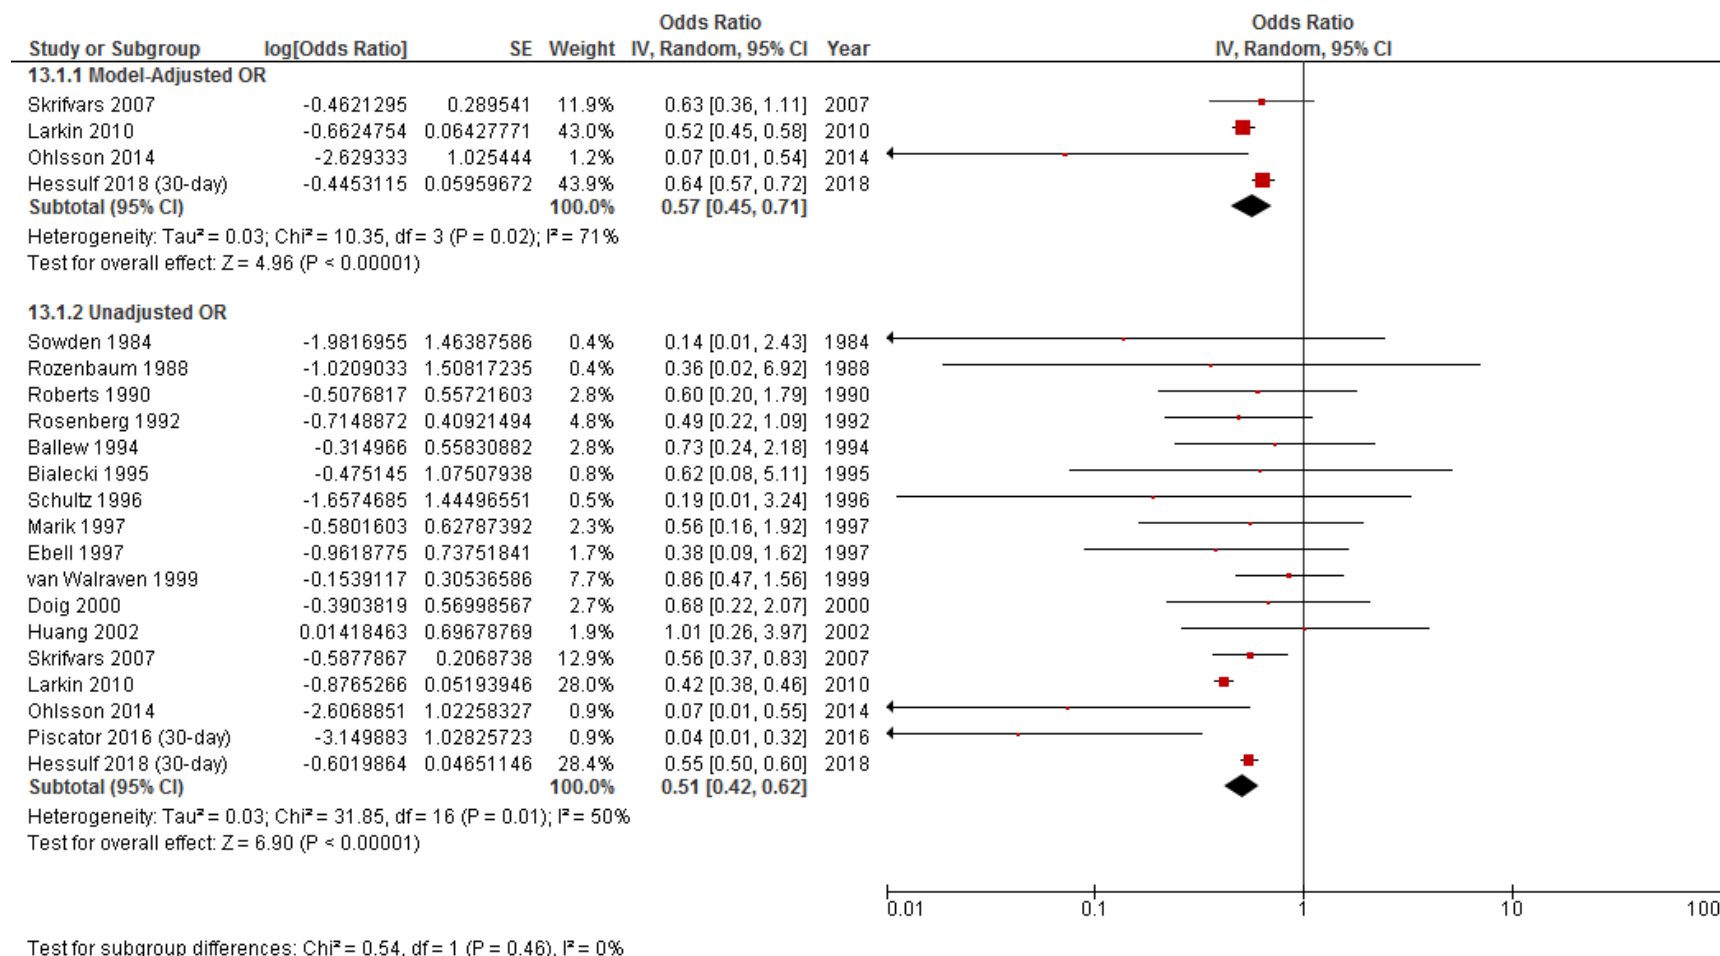

**Supplemental Figure 5: Forest Plots of Adjusted and Unadjusted Analyses for Association Between Congestive Heart Failure and Survival Following In-Hospital Cardiac Arrest.** Abbreviations: CI = Confidence Interval; OR = Odds Ratio; SE = Standard Error

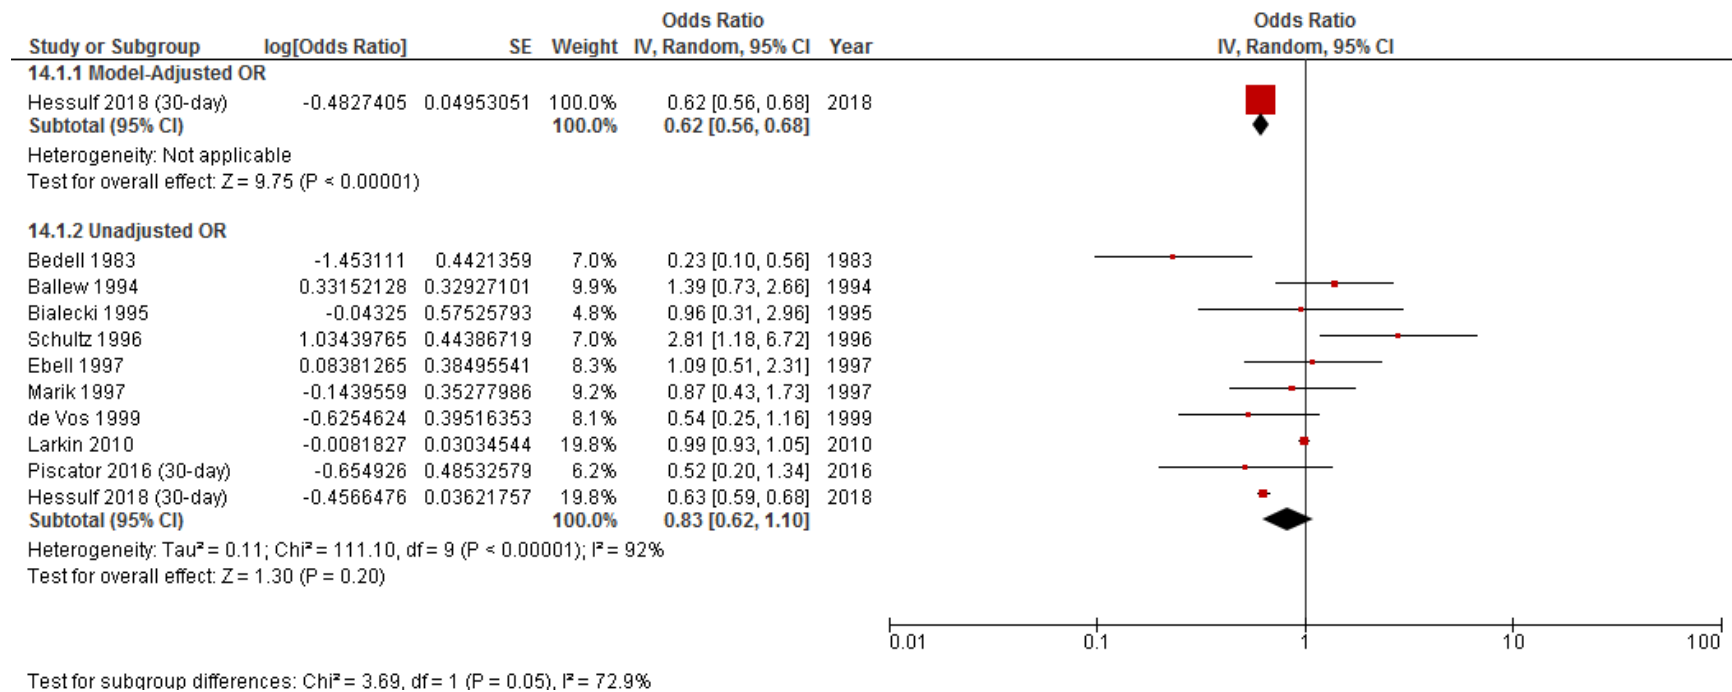

**Supplemental Figure 6: Forest Plots of Adjusted and Unadjusted Analyses for Association Between Chronic Kidney Disease and Survival Following In-Hospital Cardiac Arrest.** Abbreviations: CI = Confidence Interval; OR = Odds Ratio; SE = Standard Error

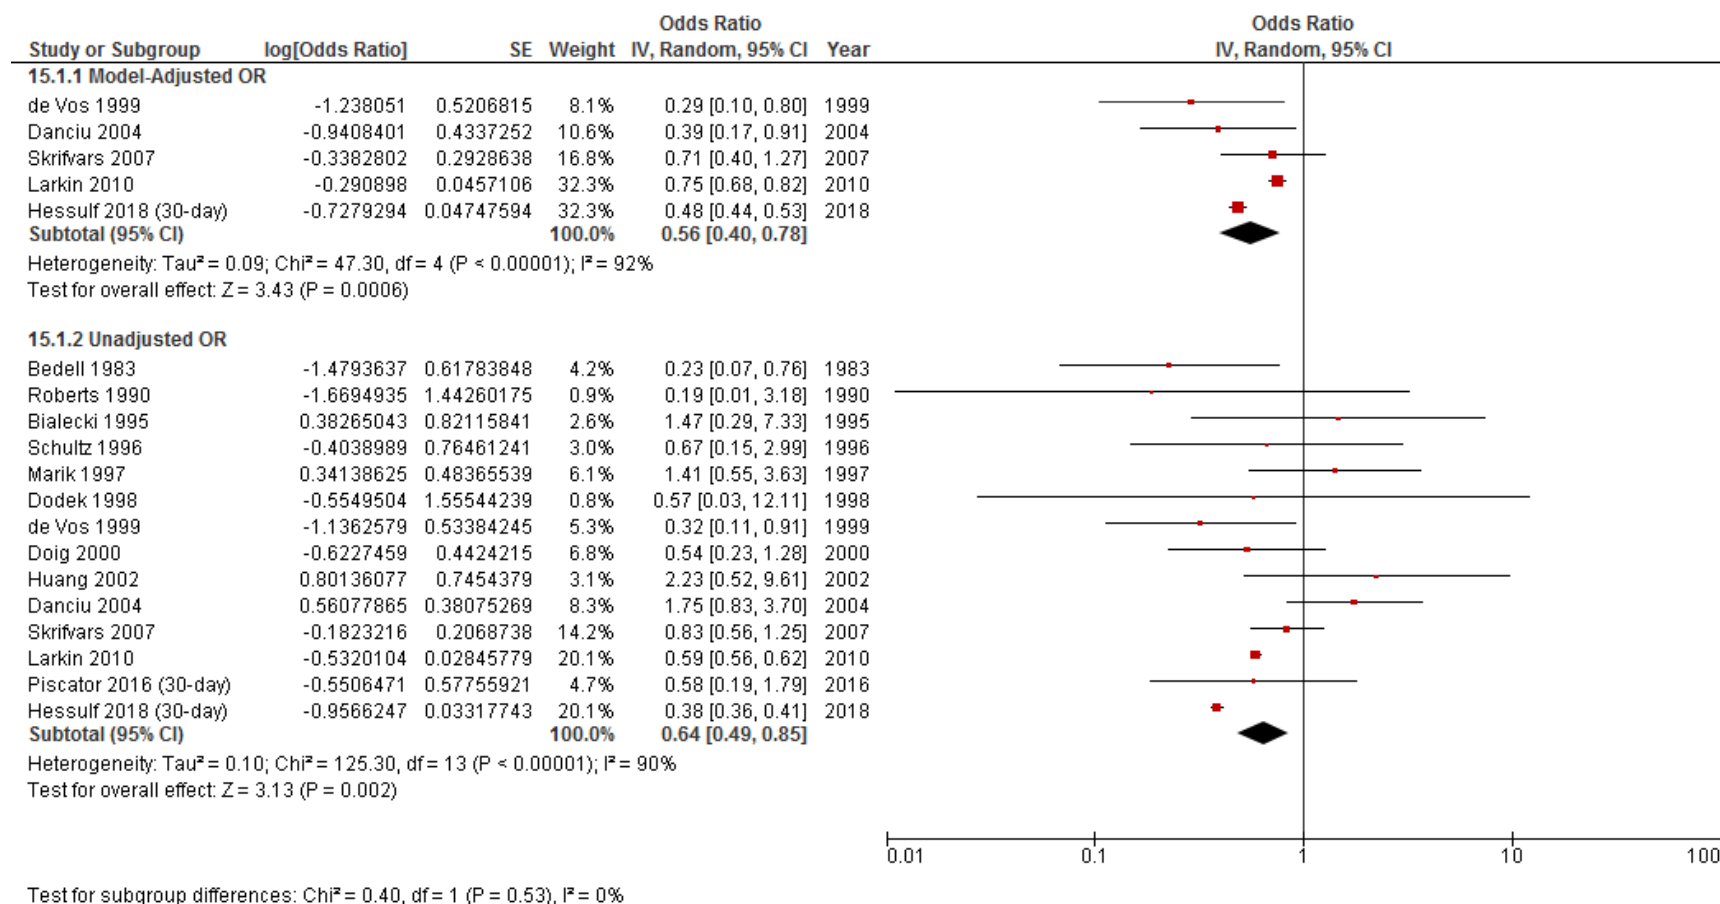

**Supplemental Figure 7: Forest Plots of Adjusted and Unadjusted Analyses for Association Between Chronic Obstructive Pulmonary Disease and Survival Following In-Hospital Cardiac Arrest.** Abbreviations: CI = Confidence Interval; OR = Odds Ratio; SE = Standard Error

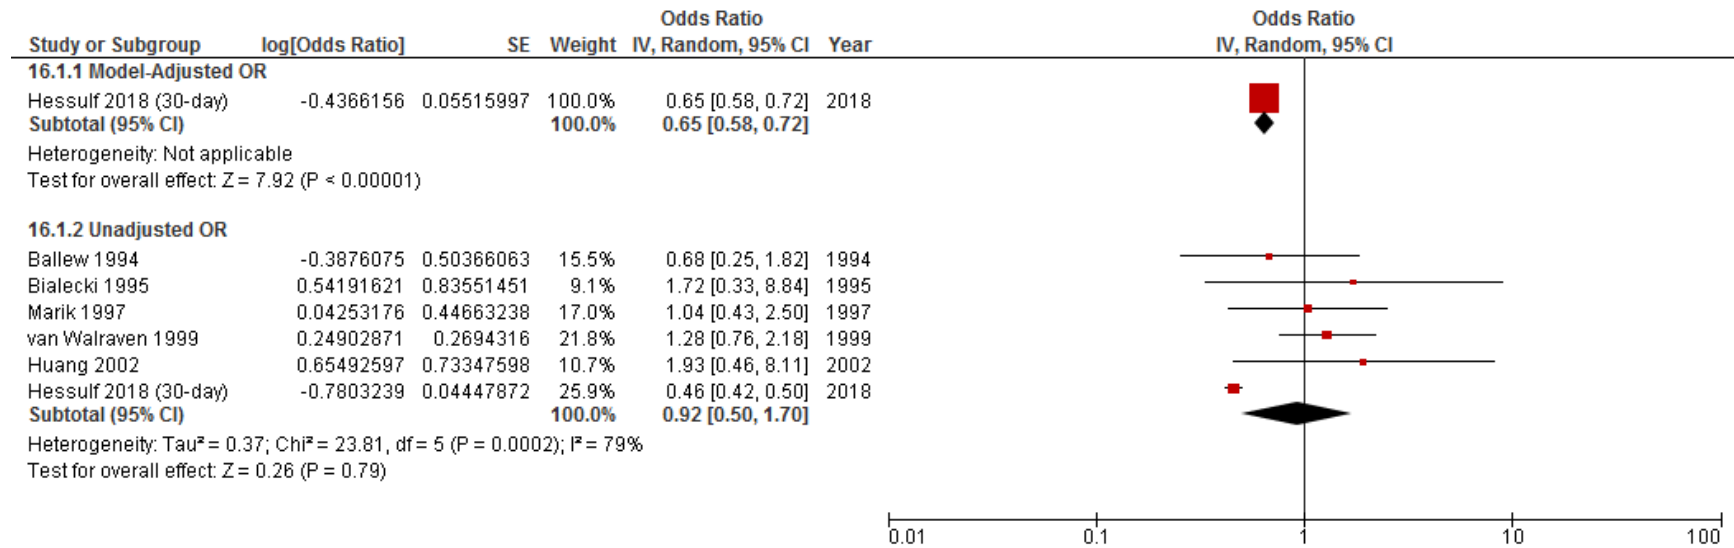

Test for subgroup differences: Chi<sup>2</sup> = 1.25, df = 1 (P = 0.26), I<sup>2</sup> = 20.3%

**Supplemental Figure 8: Forest Plots of Adjusted and Unadjusted Analyses for Association Between Diabetes Mellitus and Survival Following In-Hospital Cardiac Arrest.** Abbreviations: CI = Confidence Interval; OR = Odds Ratio; SE = Standard Error

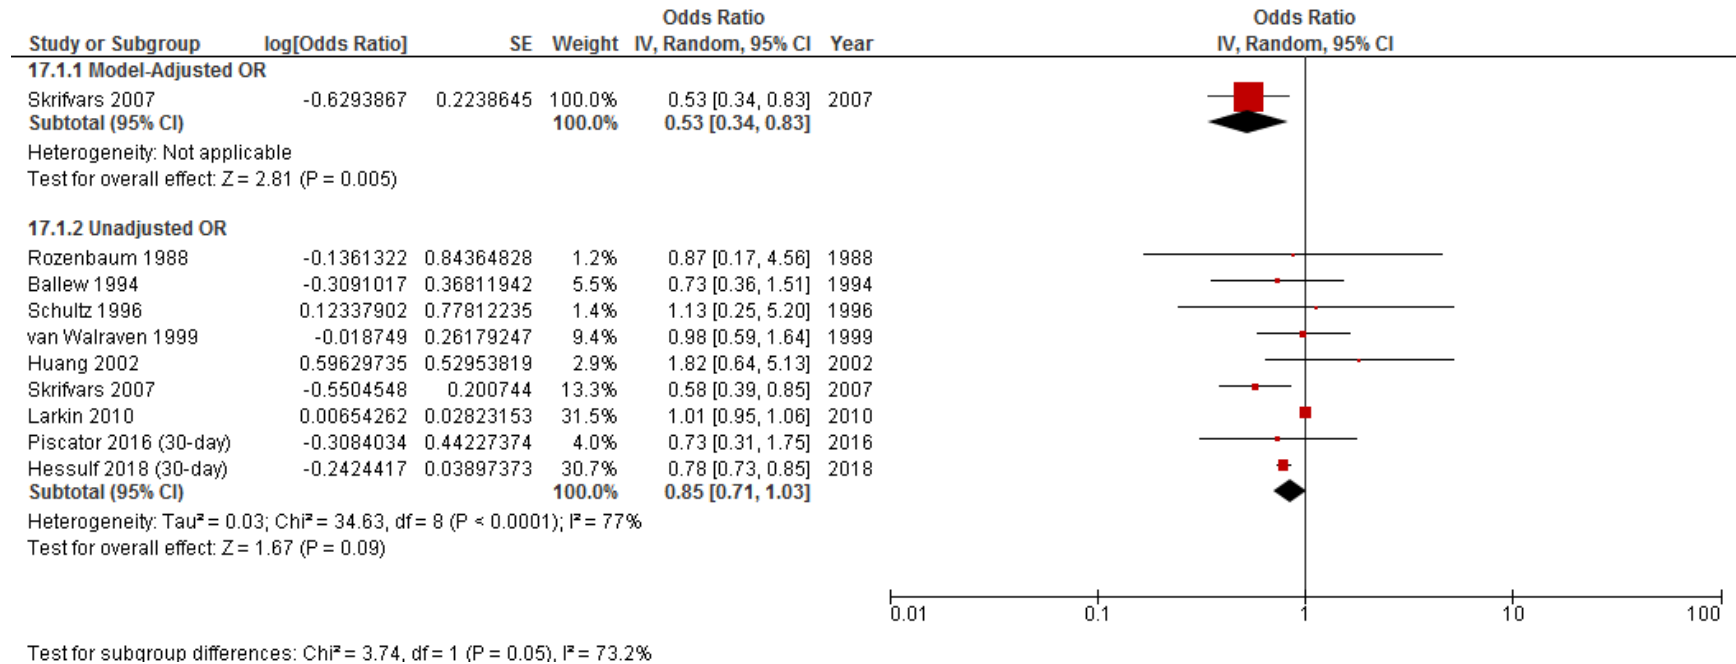



**Supplemental Figure 9: Forest Plots of Adjusted and Unadjusted Analyses for Association Between Acute Coronary Syndrome and Survival Following In-Hospital Cardiac Arrest.** Abbreviations: CI = Confidence Interval; OR = Odds Ratio; SE = Standard Error

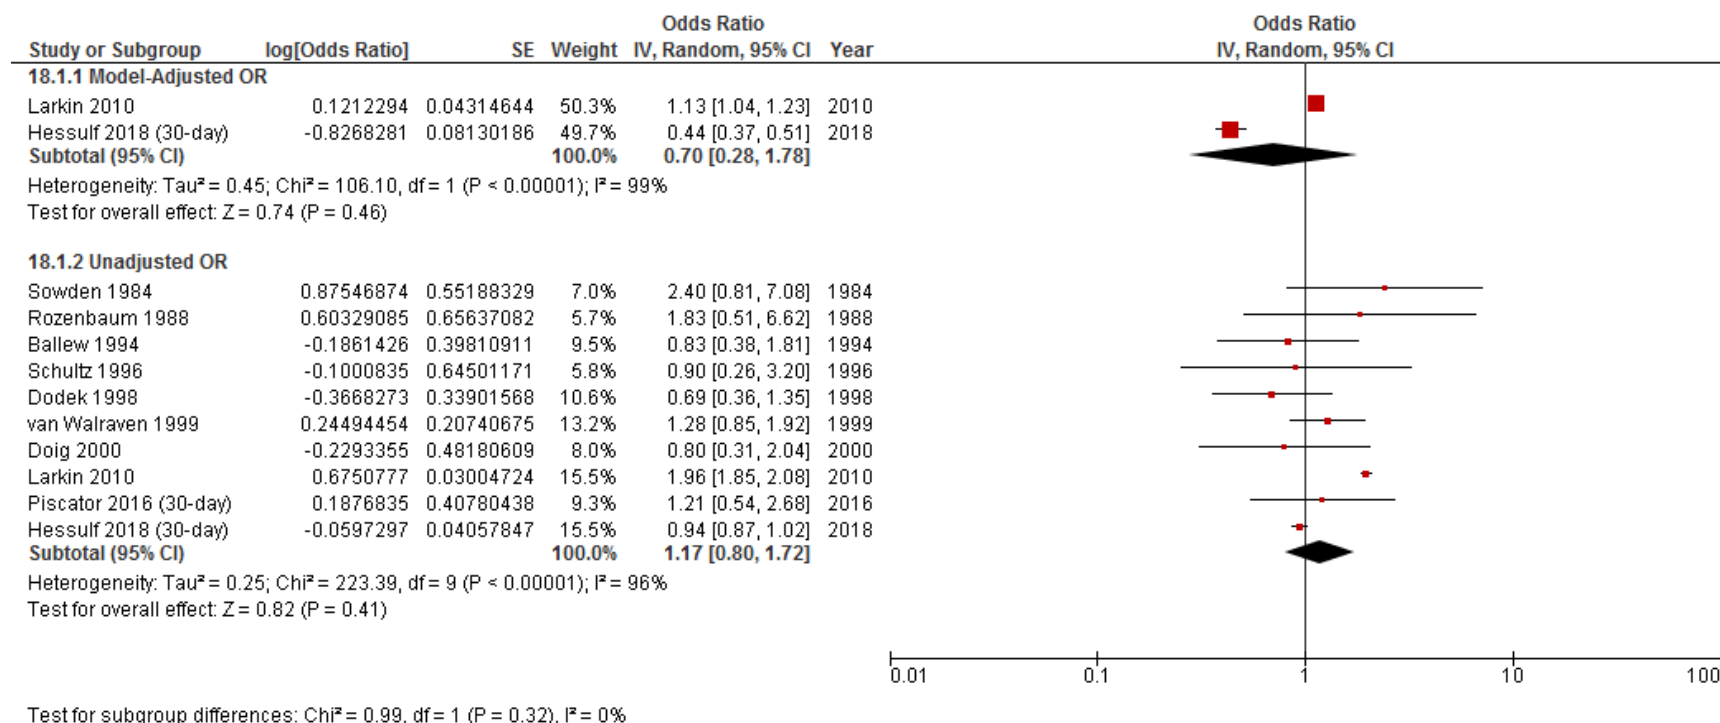

**Supplemental Figure 10: Forest Plots of Adjusted and Unadjusted Analyses for Association Between Sepsis and Survival Following In-Hospital Cardiac Arrest.** Abbreviations: CI = Confidence Interval; OR = Odds Ratio; SE = Standard Error

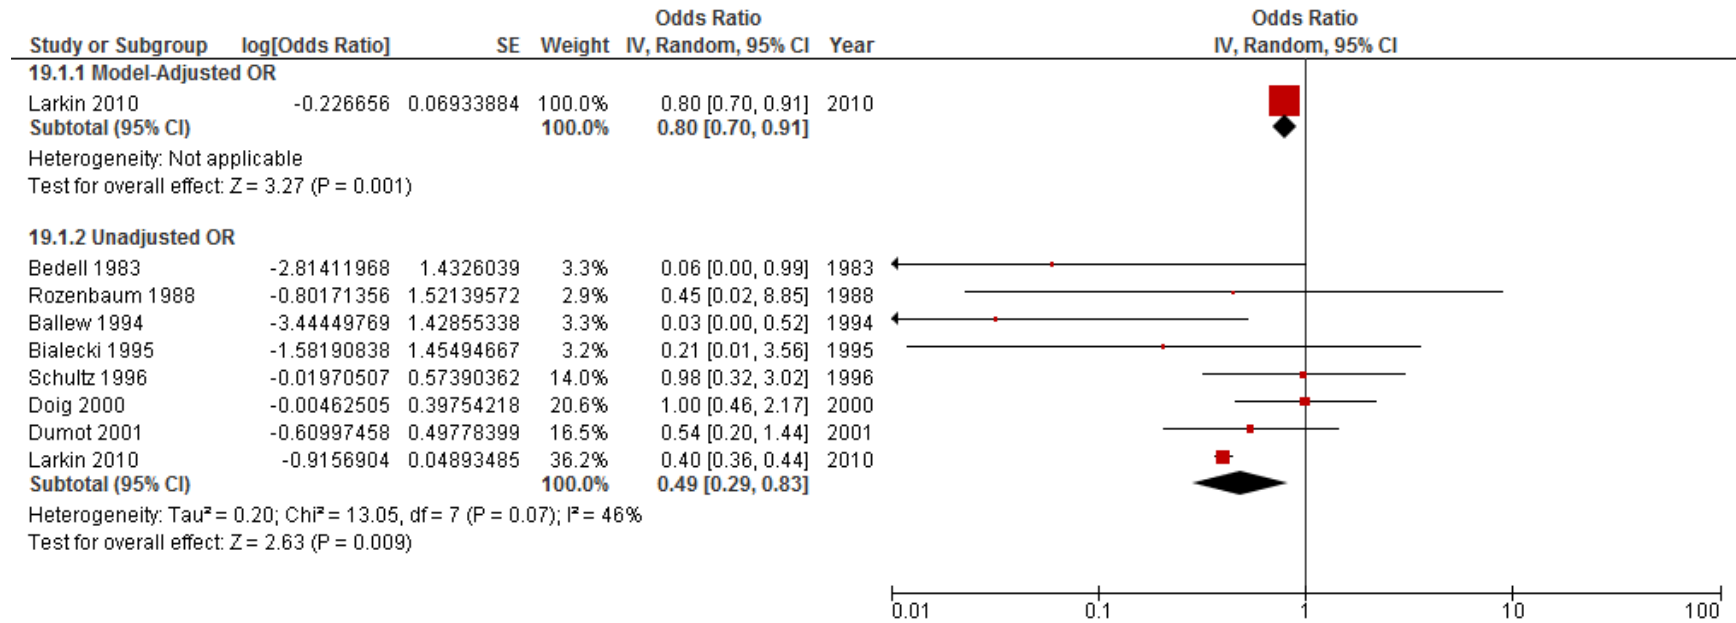

Test for subgroup differences: Chi<sup>2</sup> = 3.04, df = 1 (P = 0.08), I<sup>2</sup> = 67.1%

**Supplemental Figure 11: Forest Plots of Adjusted and Unadjusted Analyses for Association Between Witnessed Arrest and Survival Following In-Hospital Cardiac Arrest.** Abbreviations: CI = Confidence Interval; OR = Odds Ratio; SE = Standard Error

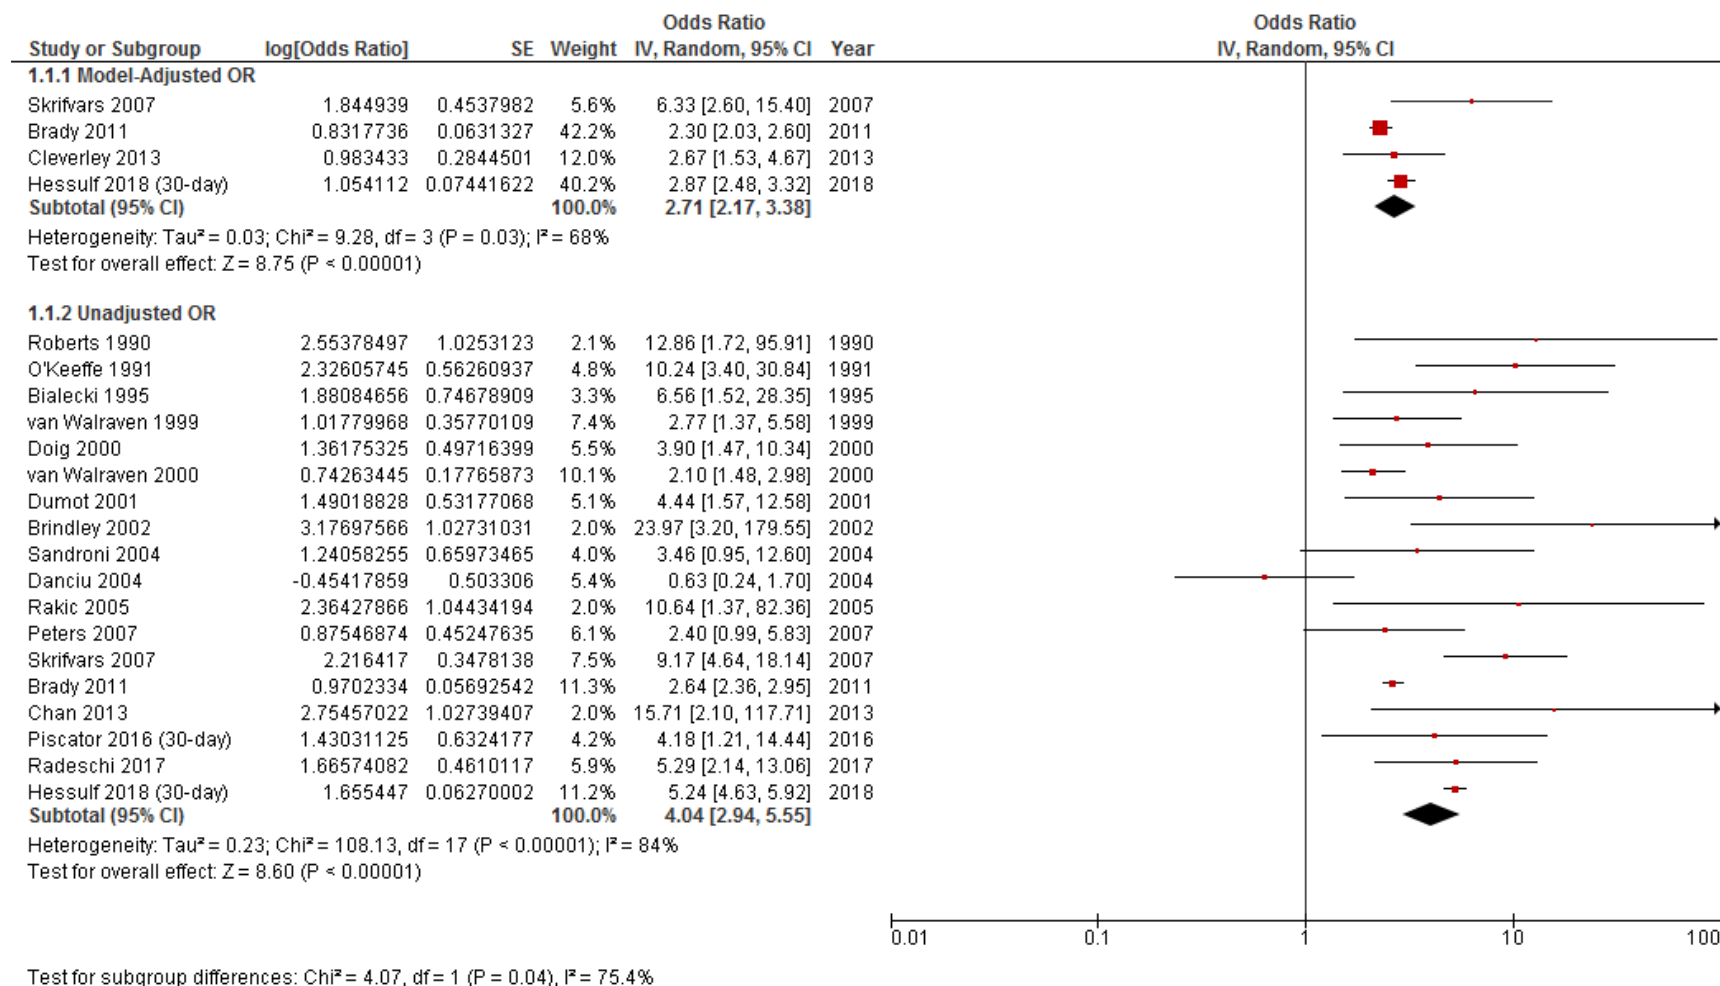

**Supplemental Figure 12: Forest Plots of Adjusted and Unadjusted Analyses for Association Between Monitored Arrest and Survival Following In-Hospital Cardiac Arrest.** Abbreviations: CI = Confidence Interval; OR = Odds Ratio; SE = Standard Error

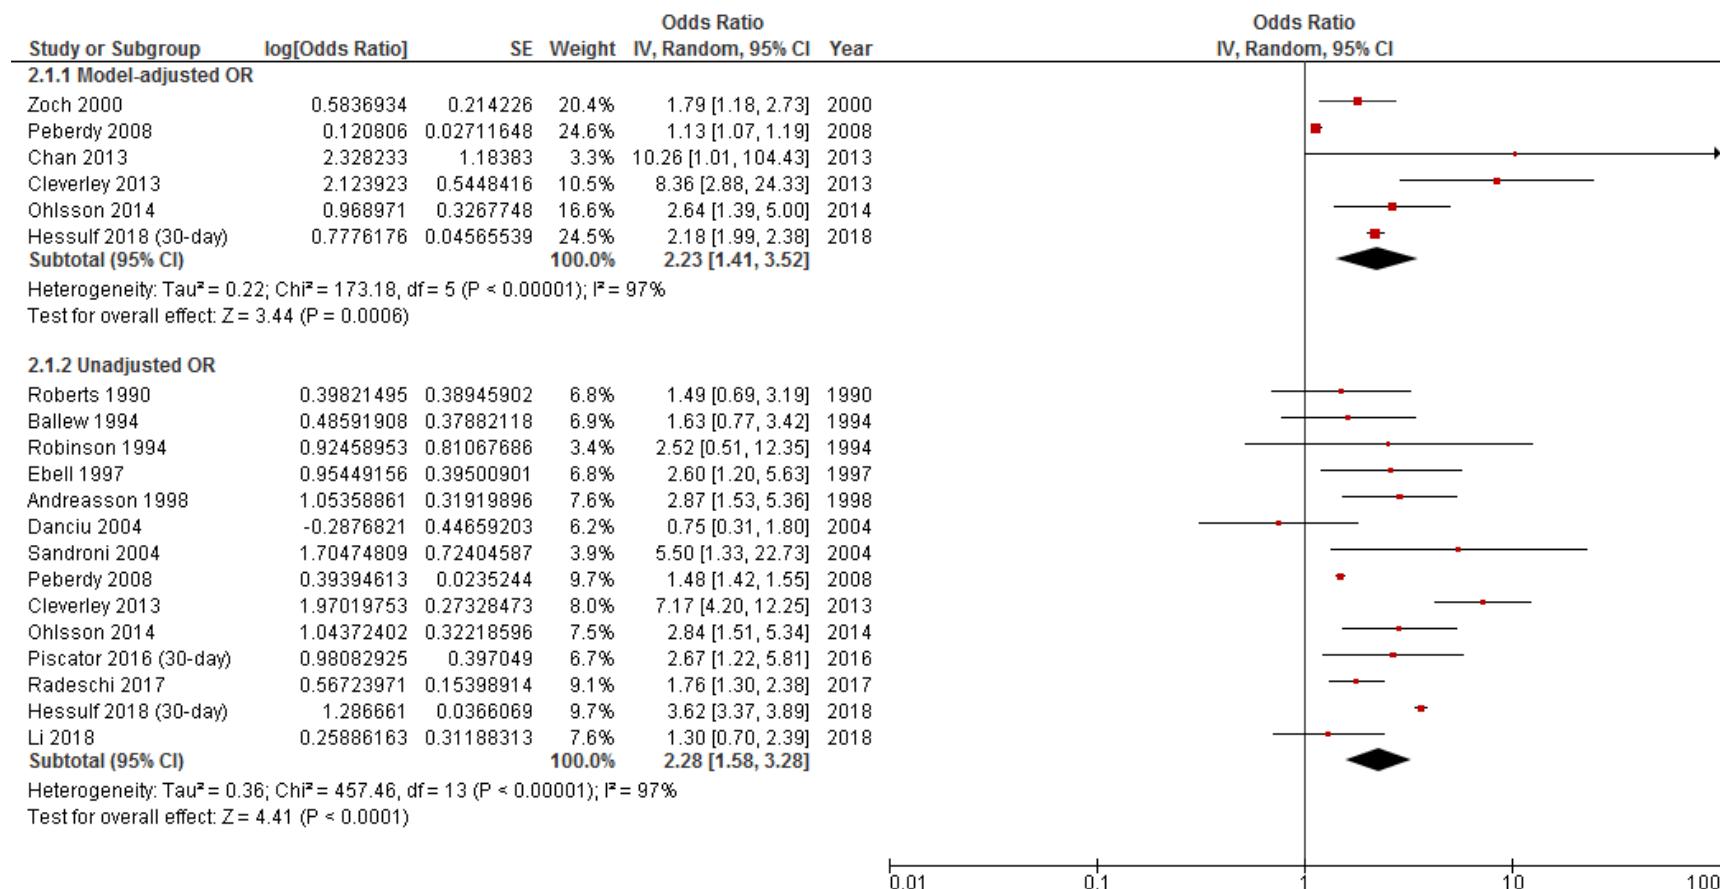

Test for subgroup differences: Chi<sup>2</sup> = 0.00, df = 1 (P = 0.94), I<sup>2</sup> = 0%

**Supplemental Figure 13: Forest Plots of Adjusted and Unadjusted Analyses for Association Between Arrest During Daytime Hours and Survival Following In-Hospital Cardiac Arrest.** Abbreviations: CI = Confidence Interval; OR = Odds Ratio; SE = Standard Error

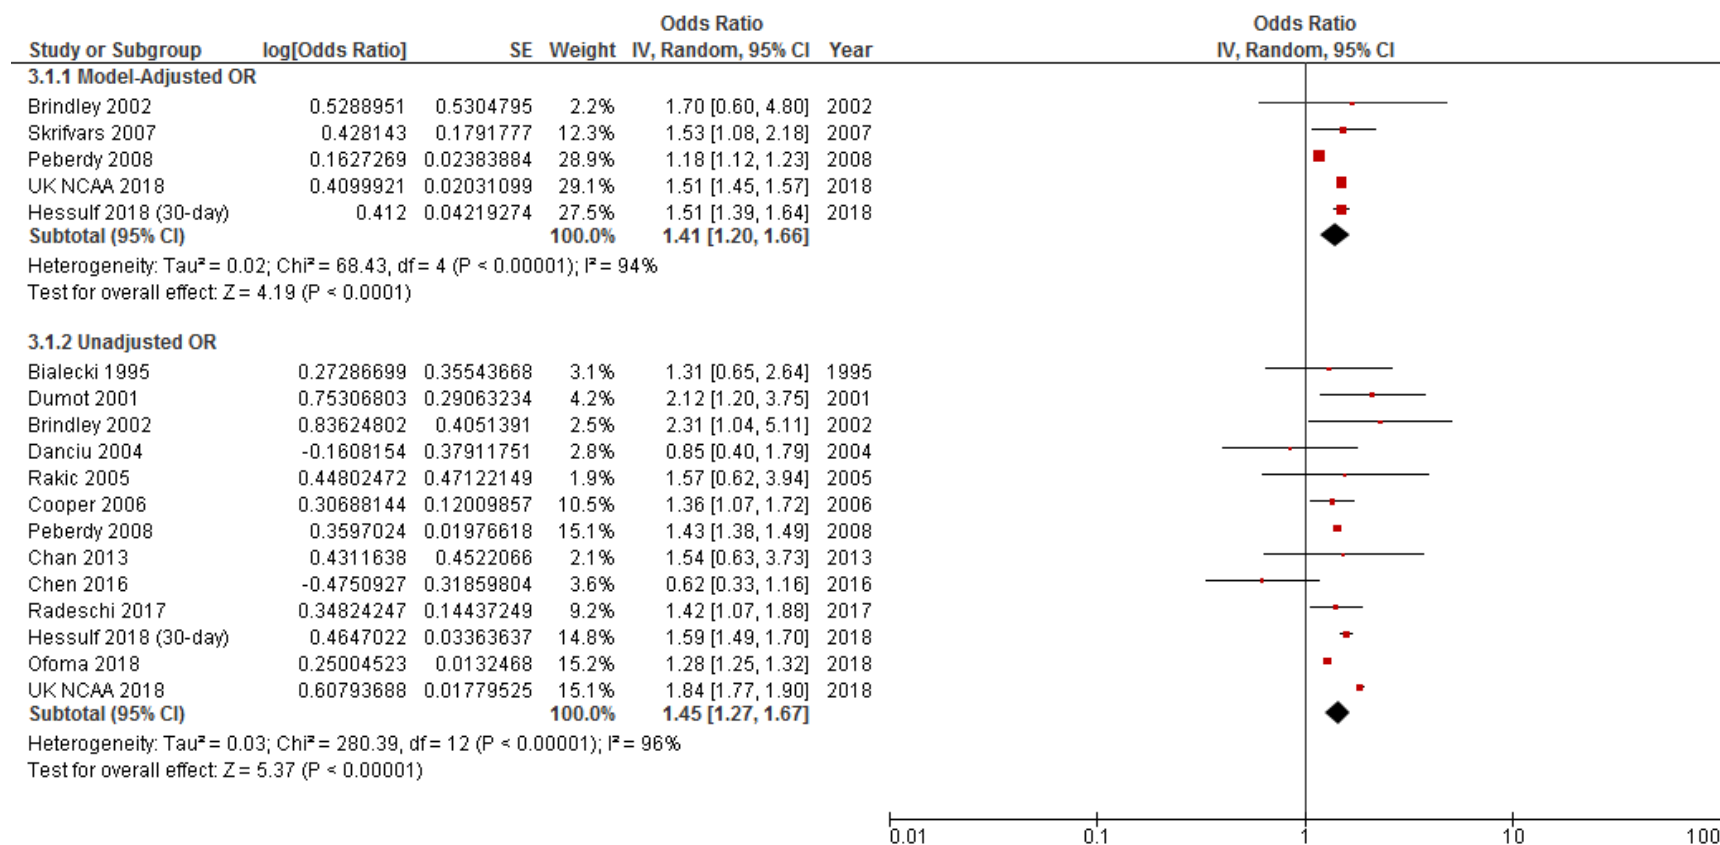

Test for subgroup differences: Chi<sup>2</sup> = 0.08, df = 1 (P = 0.78), I<sup>2</sup> = 0%

\* Note: Contrasts between time intervals of arrest were different across studies: Bialecki (7-15 vs. 15-7), Brindley (7-15 vs. 15-23 for adjusted analysis, 7-15 vs. 15-7 for unadjusted analysis), Chan (7-14 vs. 14-7), Chen (8-20 vs. 20-8), Cooper (7-15 vs. 15-7), Danciu (6-18 vs. 18-6), Dumot (6-24 vs. 0-6), Hessulf (8-20 M-F vs. other), Ofoma (7-23 M-F vs. other), Peberdy (7-23 vs. 23-7), Rakic (8-16 vs. 16-8), Skrifvars (mixture of 8-17 and 8-15:45 M-F vs. other), UK NCAA (8-20 vs. 20-8)

**Supplemental Figure 14: Forest Plots of Adjusted and Unadjusted Analyses for Association Between Ventricular Tachycardia and Survival Following In-Hospital Cardiac Arrest.** Abbreviations: CI = Confidence Interval; OR = Odds Ratio; SE = Standard Error

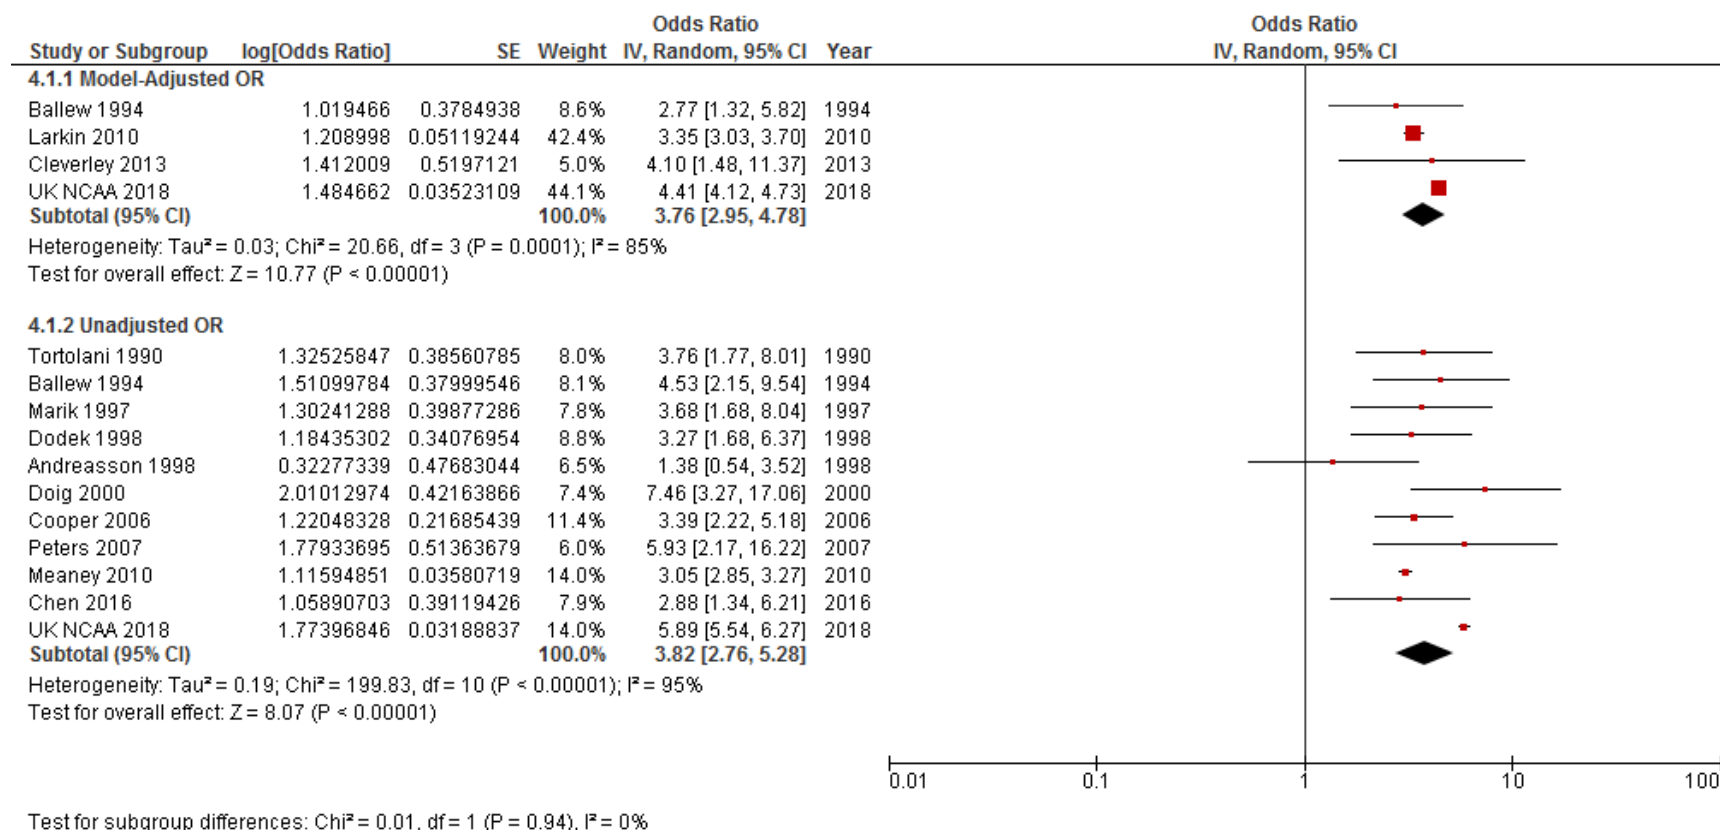

**Supplemental Figure 15: Forest Plots of Adjusted and Unadjusted Analyses for Association Between Ventricular Fibrillation and Survival Following In-Hospital Cardiac Arrest.** Abbreviations: CI = Confidence Interval; OR = Odds Ratio; SE = Standard Error

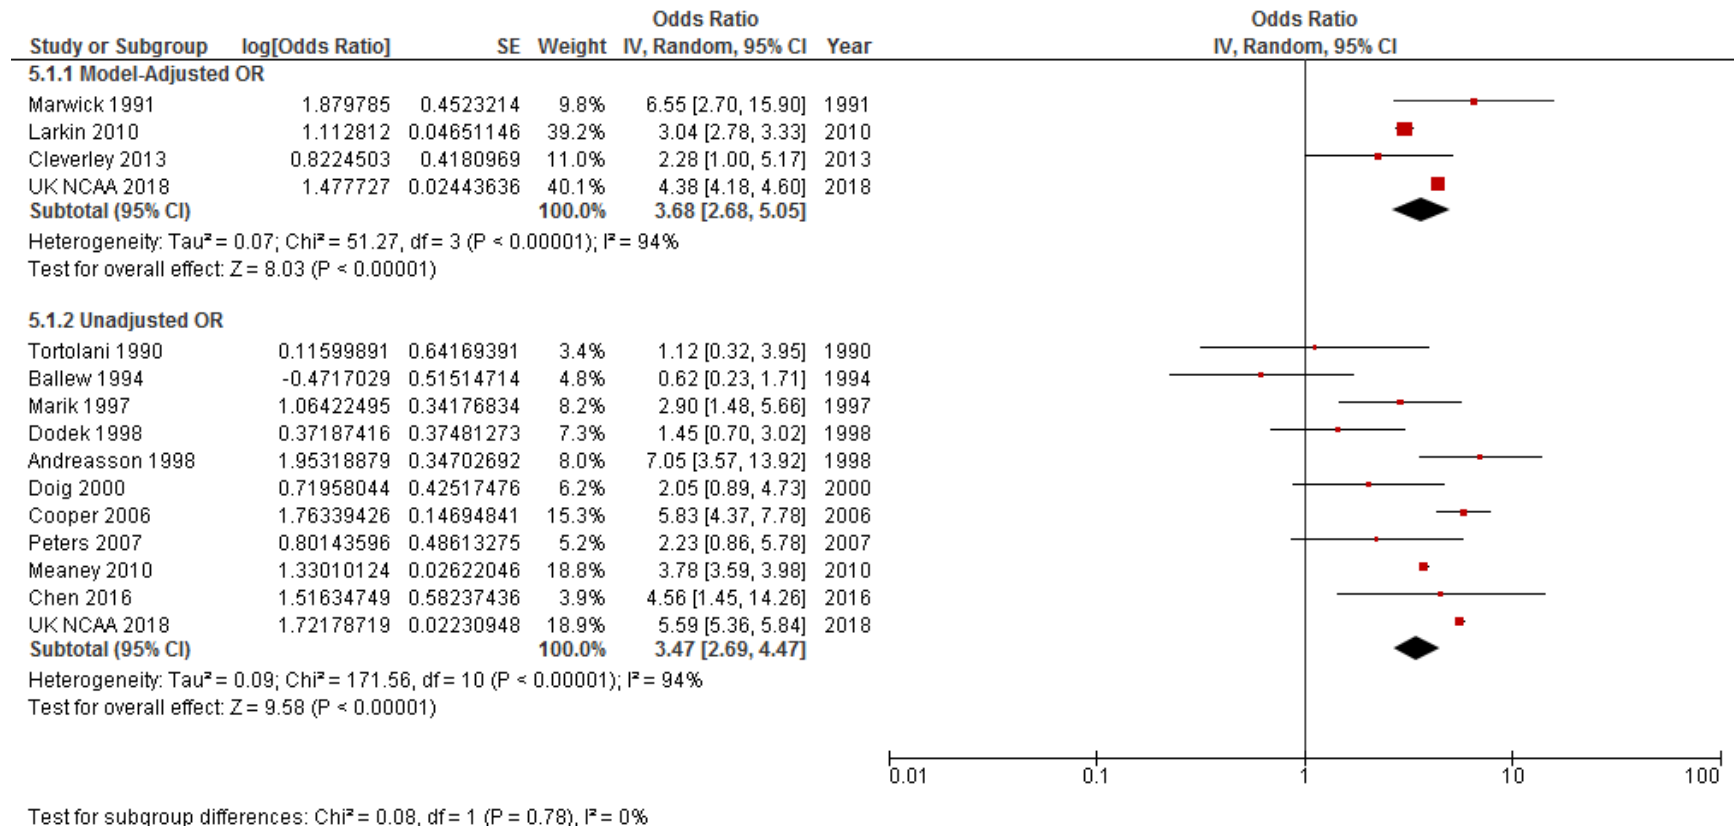

**Supplemental Figure 16: Forest Plots of Adjusted and Unadjusted Analyses for Association Between Asystole and Survival Following In-Hospital Cardiac Arrest.** Abbreviations: CI = Confidence Interval; OR = Odds Ratio; SE = Standard Error

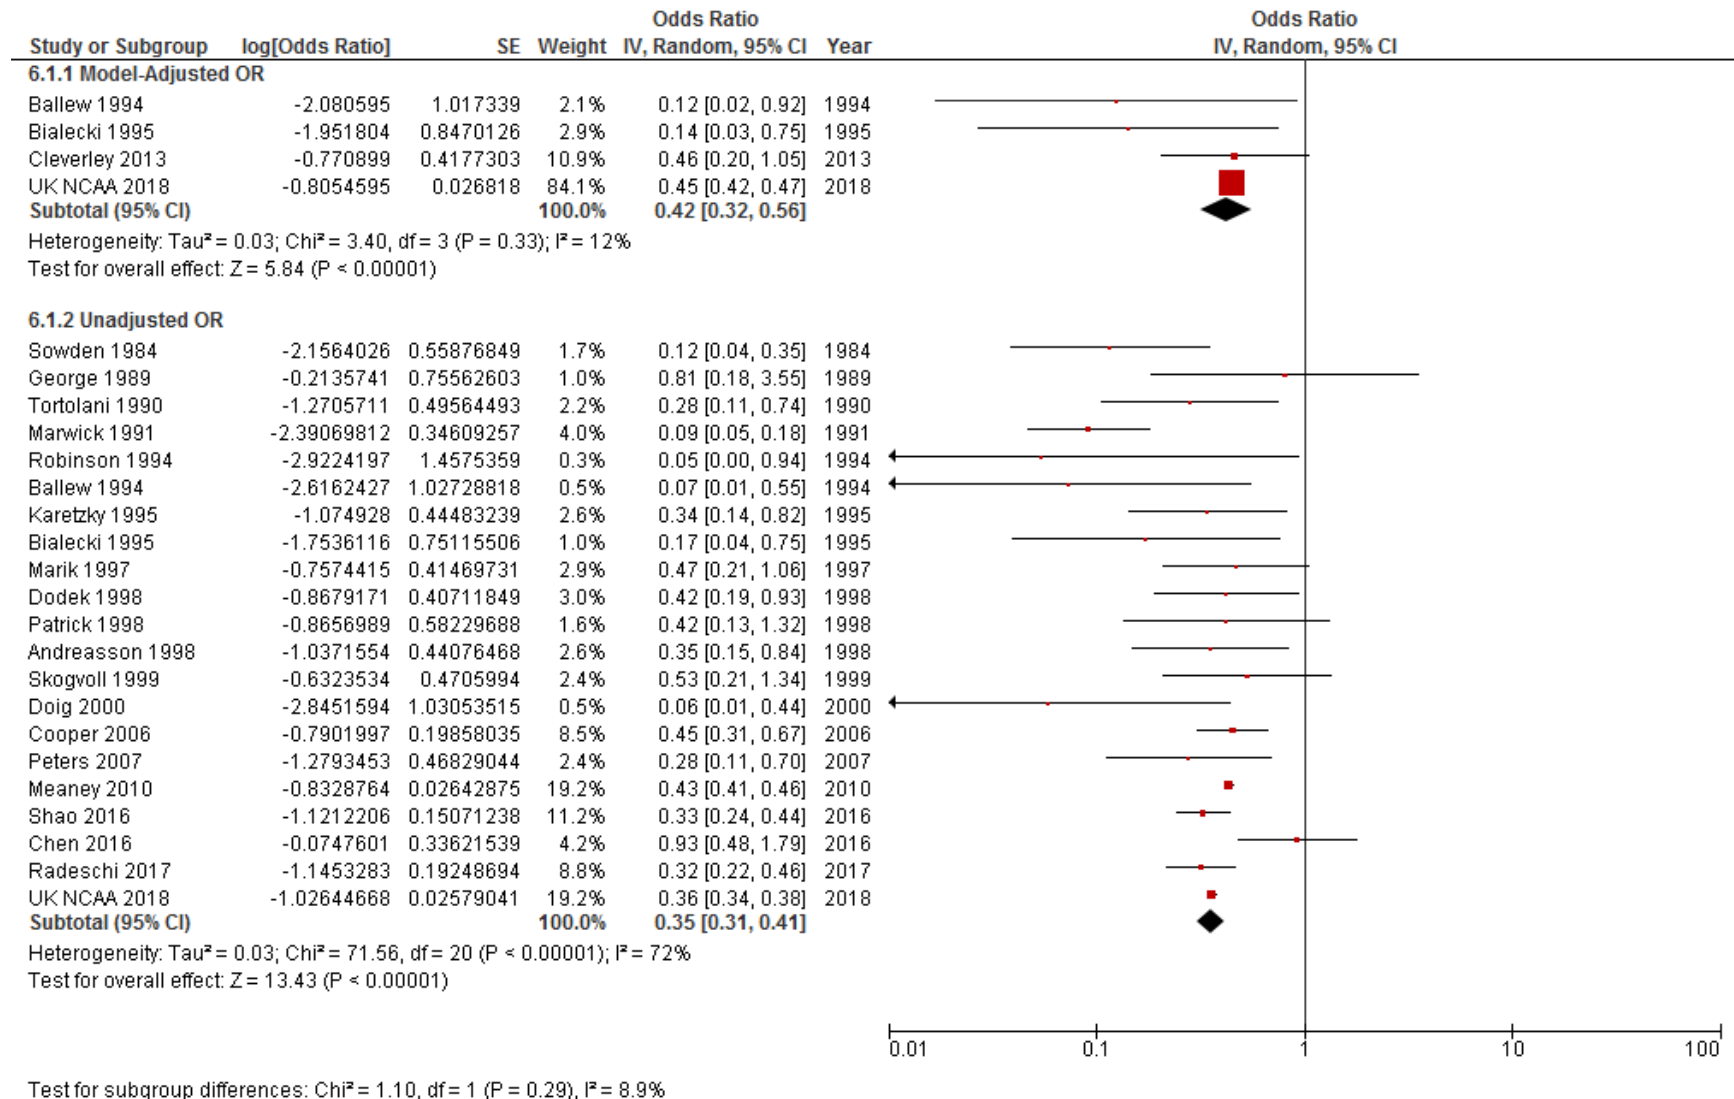



**Supplemental Figure 17: Forest Plots of Adjusted and Unadjusted Analyses for Association Between Pulseless Electric Activity and Survival Following In-Hospital Cardiac Arrest.** Abbreviations: CI = Confidence Interval; OR = Odds Ratio; SE = Standard Error

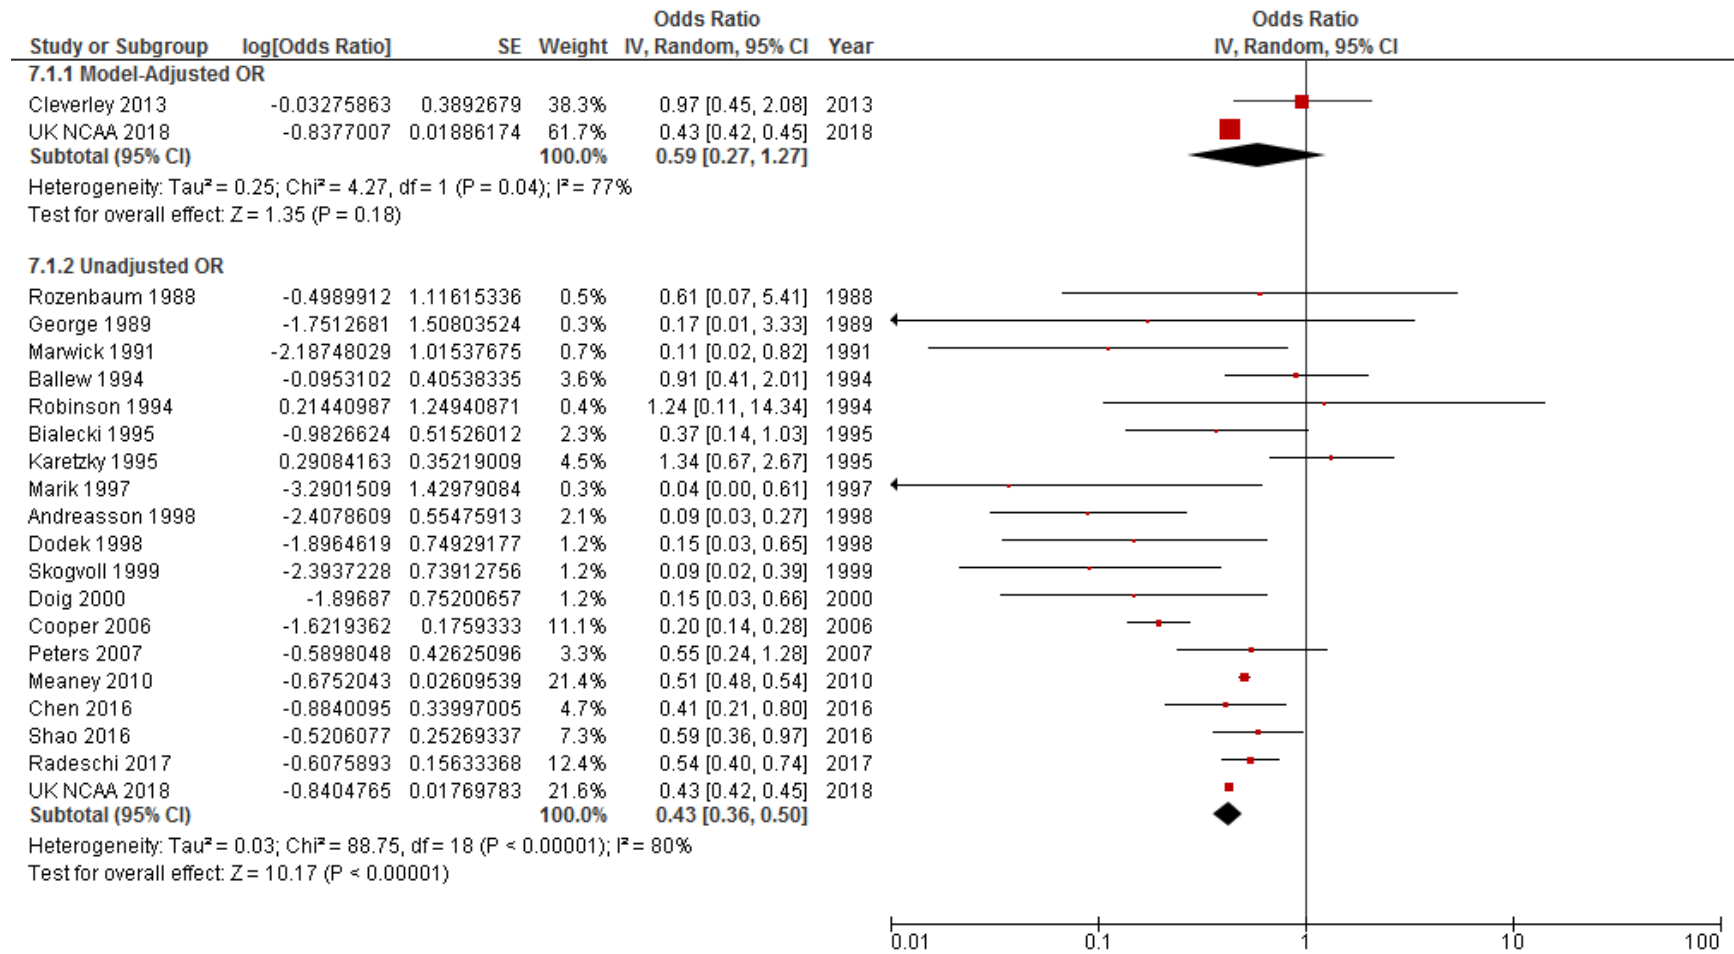

Test for subgroup differences: Chi<sup>2</sup> = 0.64, df = 1 (P = 0.42), I<sup>2</sup> = 0%

**Supplemental Figure 18: Forest Plots of Adjusted and Unadjusted Analyses for Association Between Shockable Rhythm and Survival Following In-Hospital Cardiac Arrest.**

Abbreviations: CI = Confidence Interval; OR = Odds Ratio; SE = Standard Error

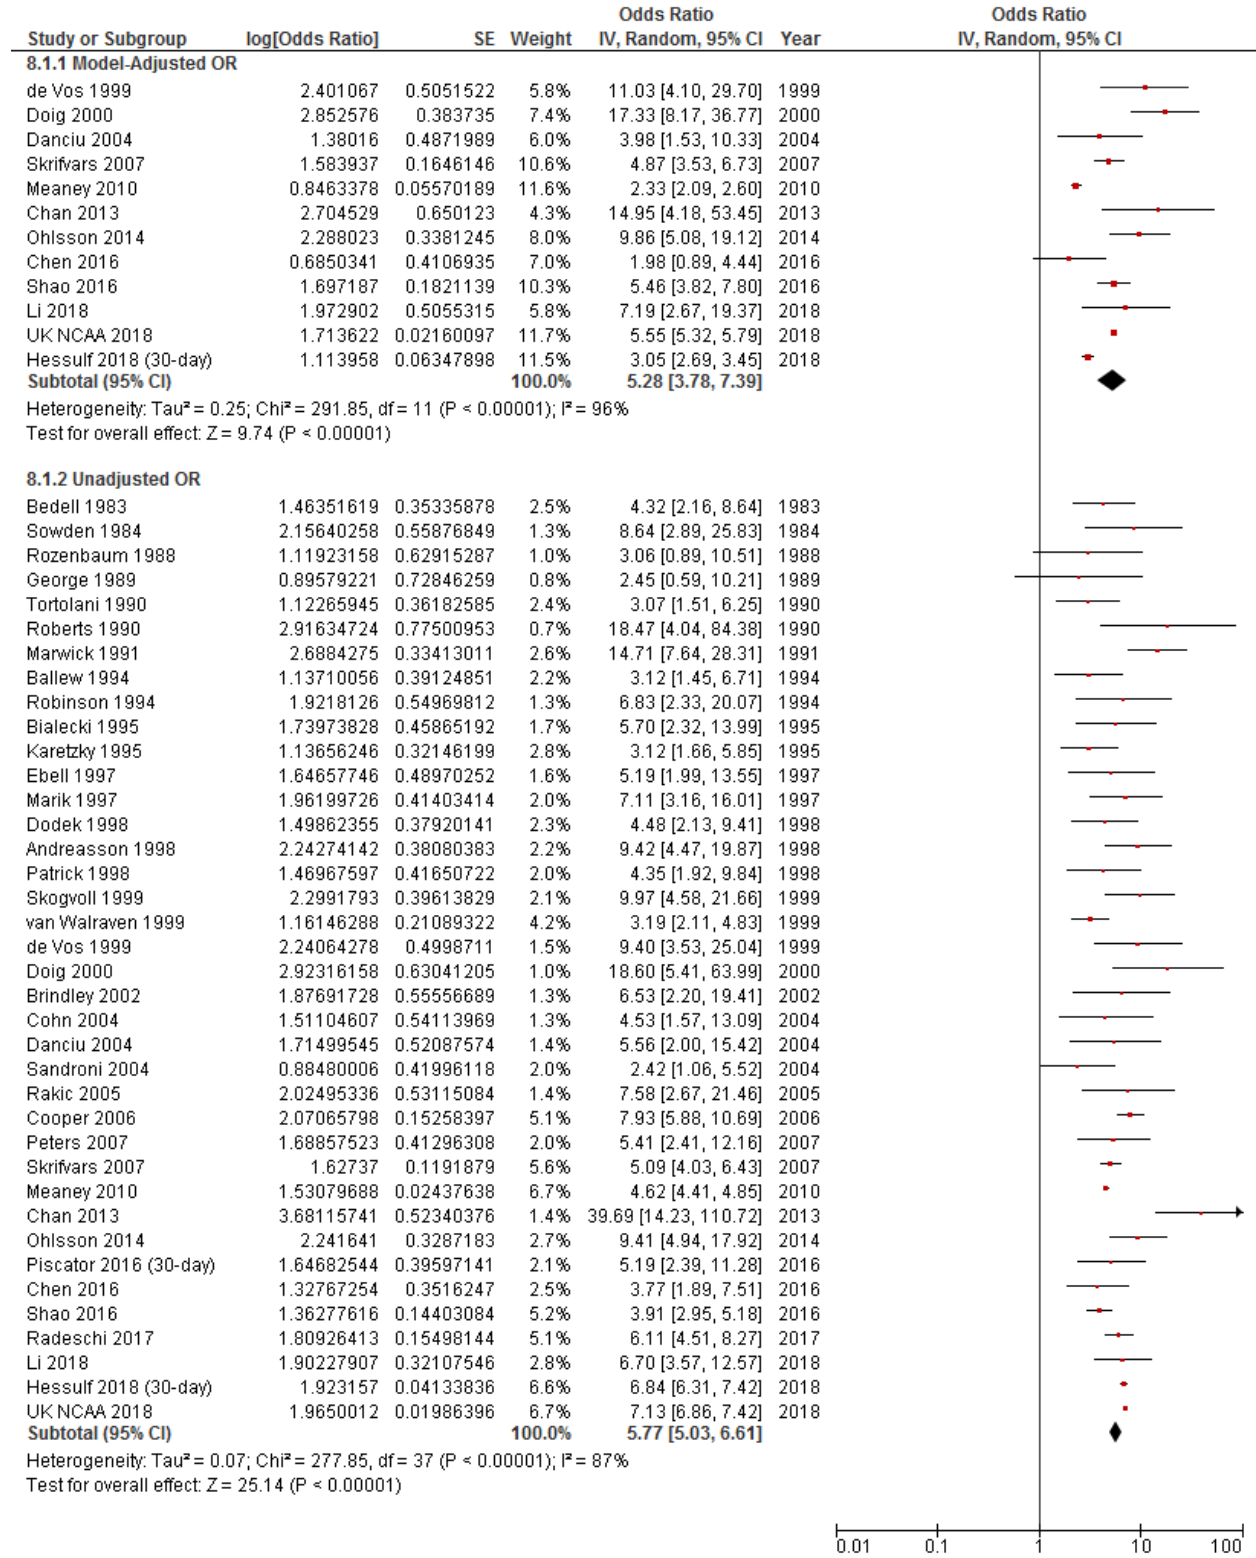

Test for subgroup differences: Chi<sup>2</sup> = 0.23, df = 1 (P = 0.63), I<sup>2</sup> = 0%

**Supplemental Figure 19: Forest Plots of Adjusted and Unadjusted Analyses for Association Between Endotracheal Intubation and Survival Following In-Hospital Cardiac Arrest.** Abbreviations: CI = Confidence Interval; OR = Odds Ratio; SE = Standard Error

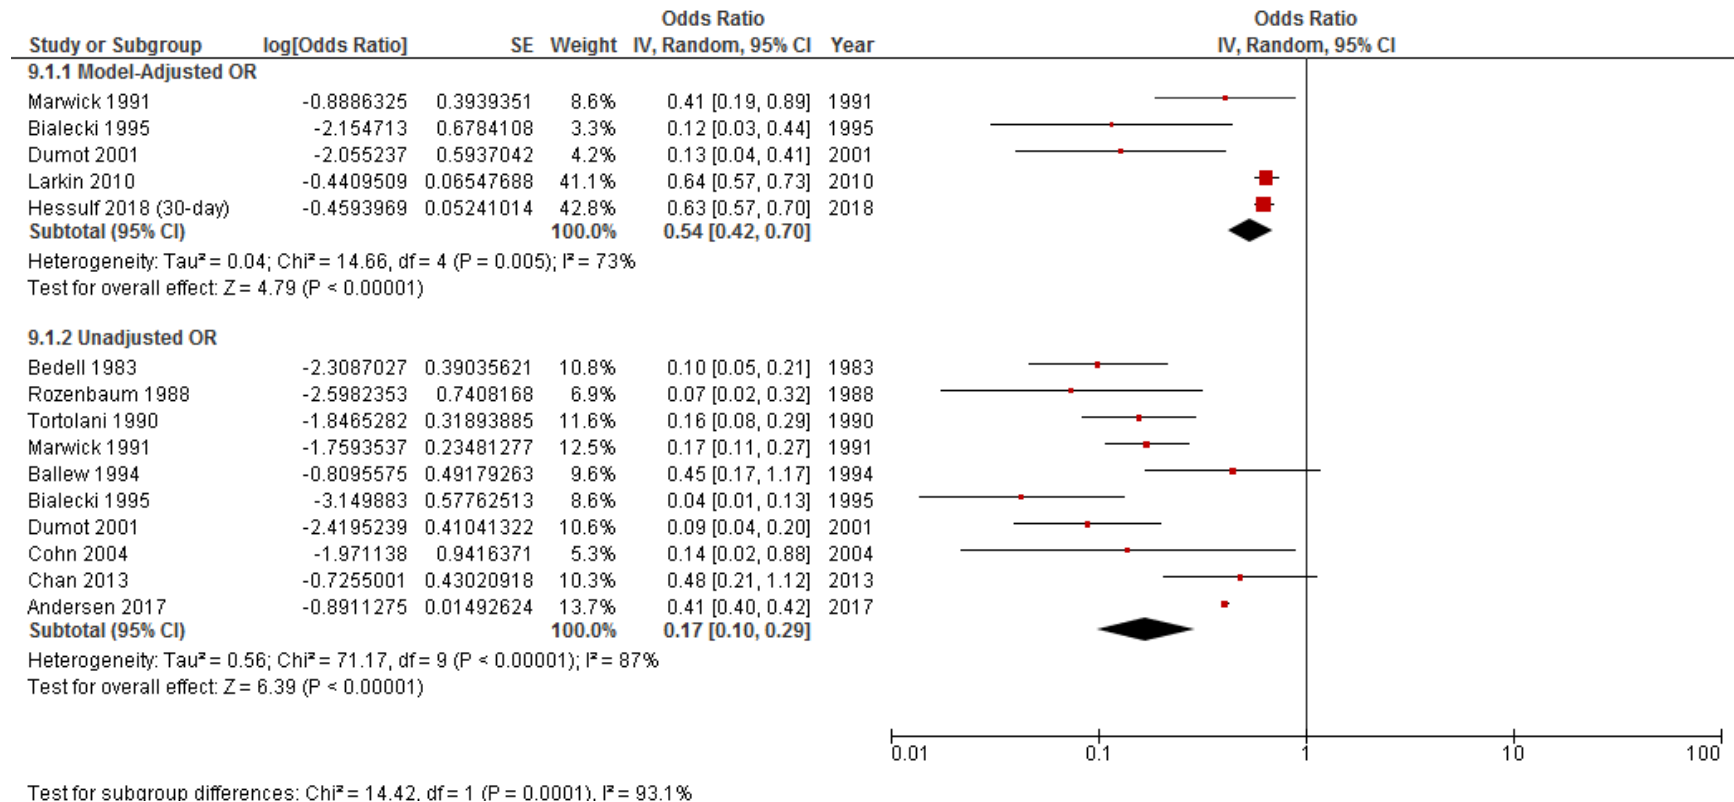

**Supplemental Figure 20: Forest Plots of Adjusted and Unadjusted Analyses for Association Between Resuscitation Duration > 15 minutes and Survival Following In-Hospital Cardiac Arrest.** Abbreviations: CI = Confidence Interval; OR = Odds Ratio; SE = Standard Error

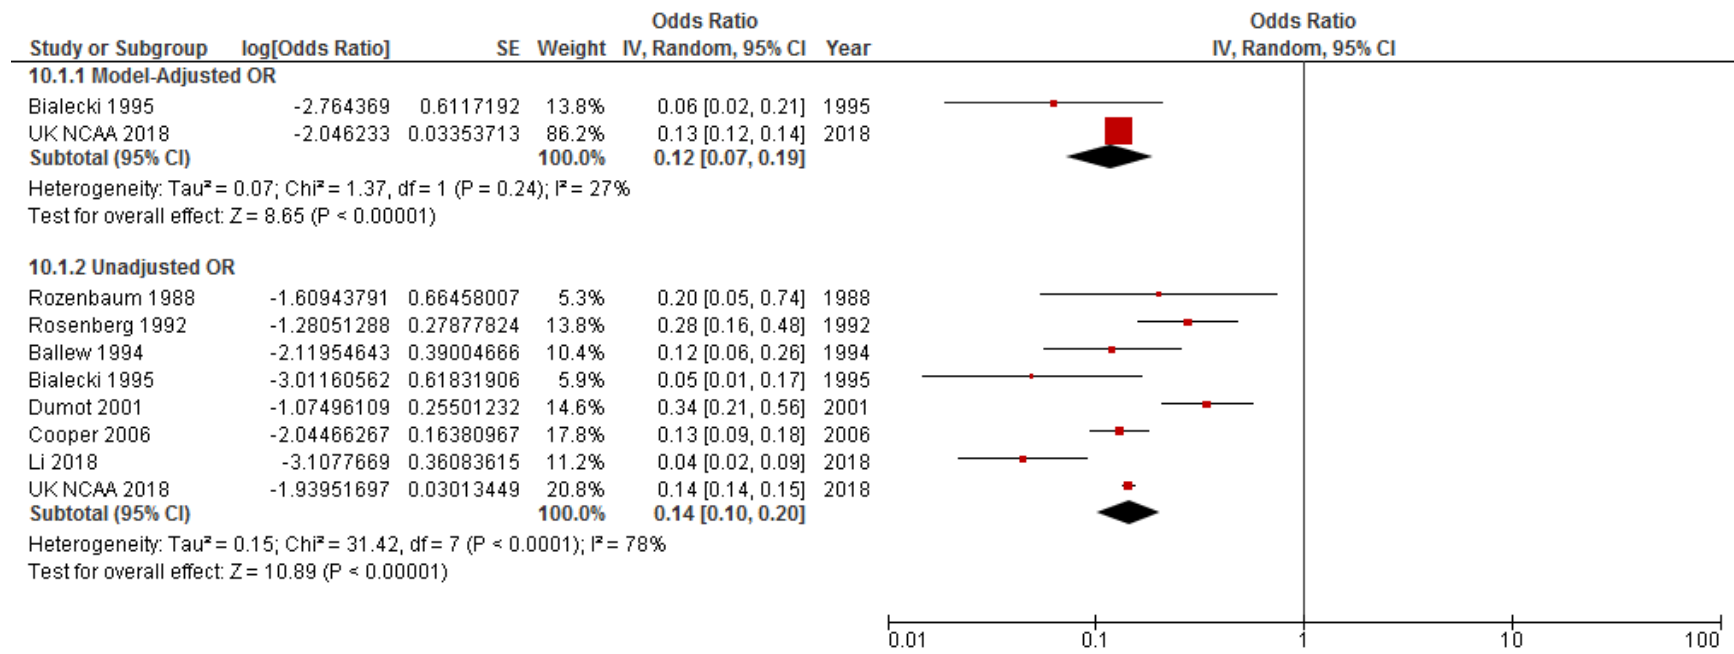

Test for subgroup differences: Chi<sup>2</sup> = 0.47, df = 1 (P = 0.49), I<sup>2</sup> = 0%
